# Supplementary material for: Phosphoryl transfer reaction catalyzed by membrane diacylglycerol kinase: a theoretical mechanism study
Source: Royal Society of Chemistry journal article supplement (doi:10.1039/c5cp03342j), 2015-01-01
Supplement: c5cp03342j1.pdf [file c5cp03342j1.pdf]

## Supplementary Material

### Phosphoryl transfer reaction catalyzed by membrane diacylglycerol kinase: a theoretical mechanism study

Yafei Jiang,<sup>a</sup> Hongwei Tan,<sup>a</sup> Jimin Zheng,<sup>a</sup> Xichen Li,<sup>a</sup> Guangju Chen<sup>a</sup> and Zongchao Jia<sup>a,b</sup>

<sup>a</sup>*College of Chemistry, Beijing Normal University, Beijing 100875, China*

<sup>b</sup>*Department of Biomedical and Molecular Sciences, Queen's University, Kingston, Ontario, Canada K7N 3L6*

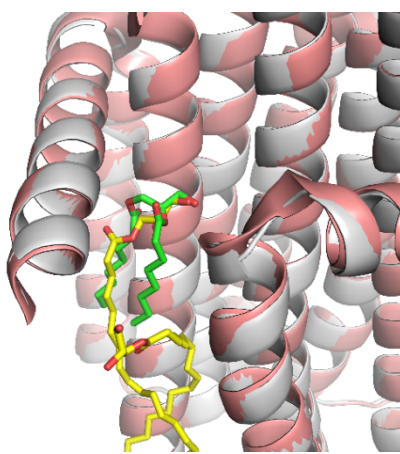

Figure S1. Alignment of the DAG-docked structure and crystal structure (PDB code: 4CK0). The DAG-docked structure is shown as grey cartoon while crystal structure is shown as brown cartoon. The substrate DAG in the docked structure is shown in green sticks and the ligand OLC in the crystal structure is shown in yellow sticks.

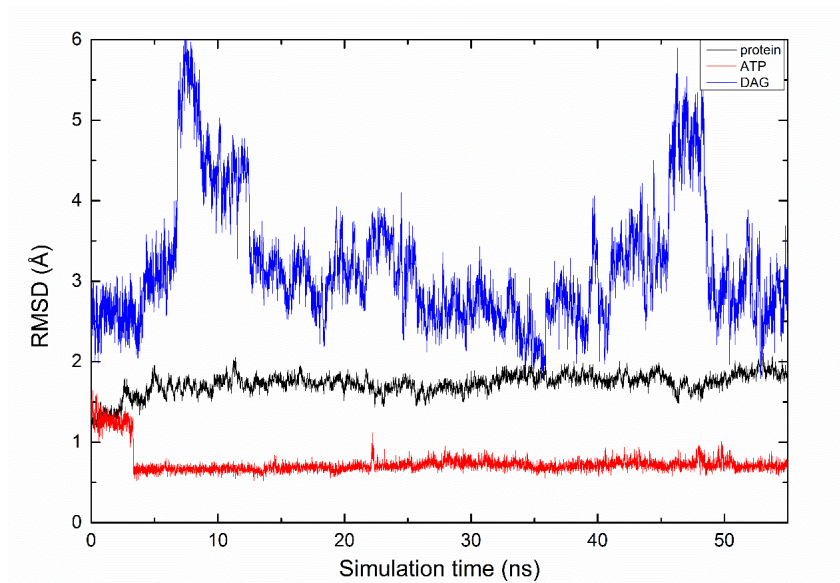

Figure S2. The RMSD values for backbone of protein, ATP and DAG in the 55ns MD runs relative to the initial structure.

Figure S3. Evolution of the coordination bond distances around  $Mg^{2+}$  ions. (a-f) hexa-coordination of Mg1. (g-l) hexa-coordination of Mg2.

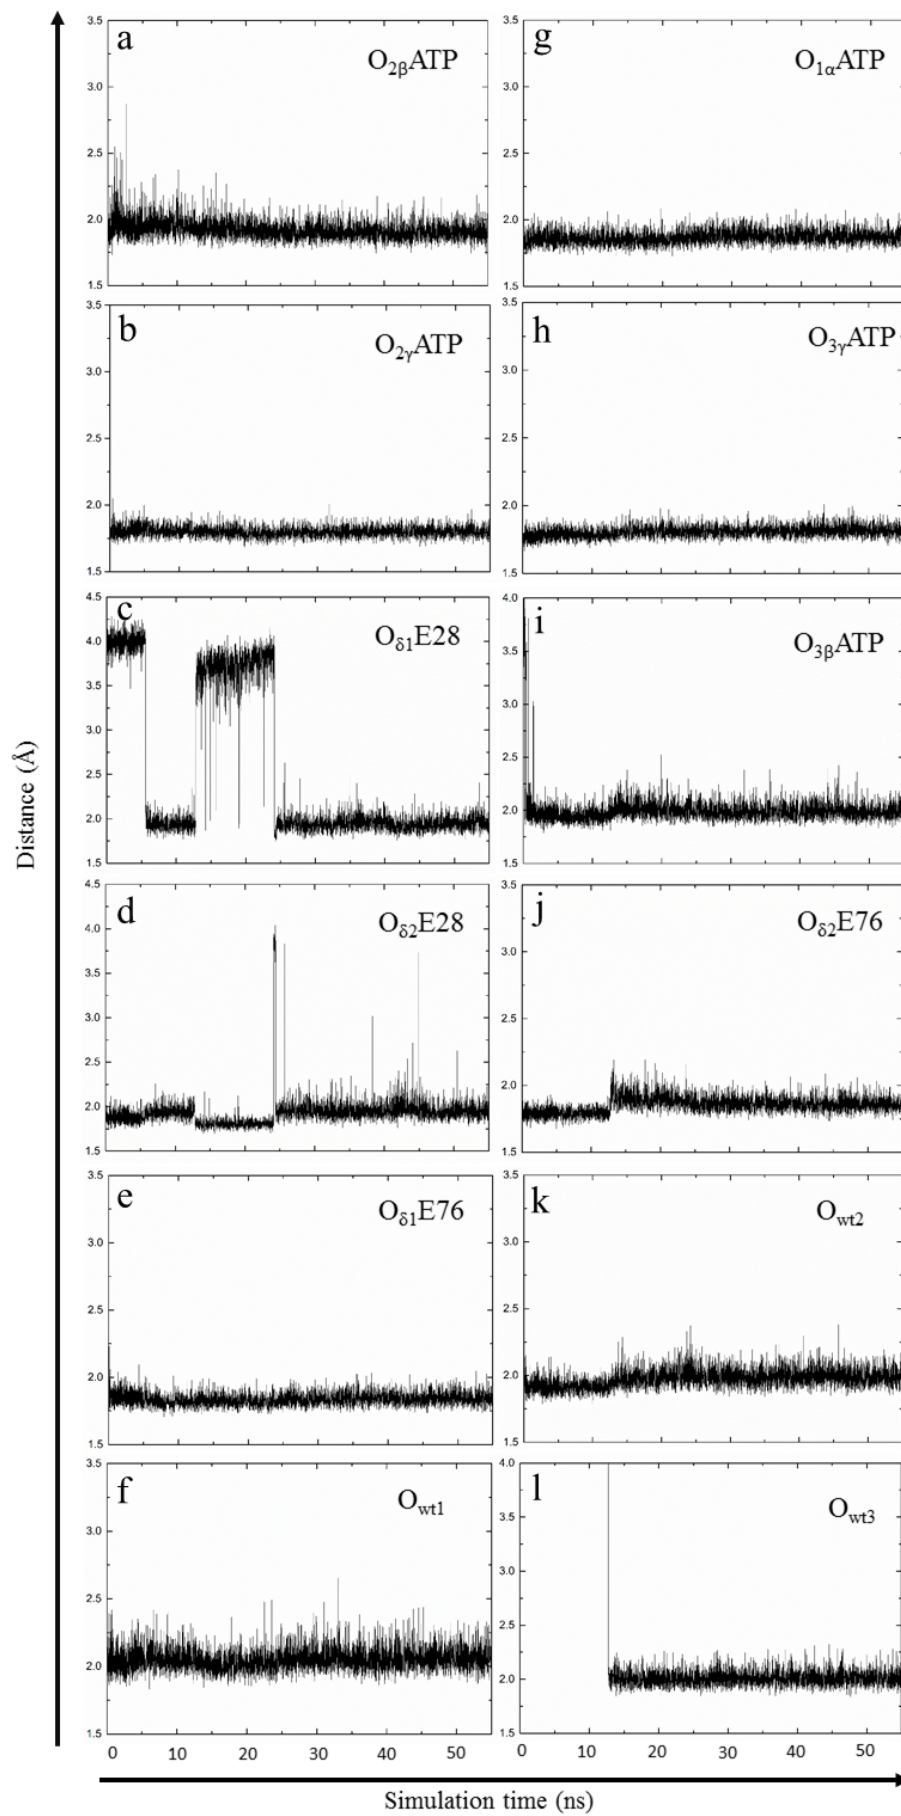

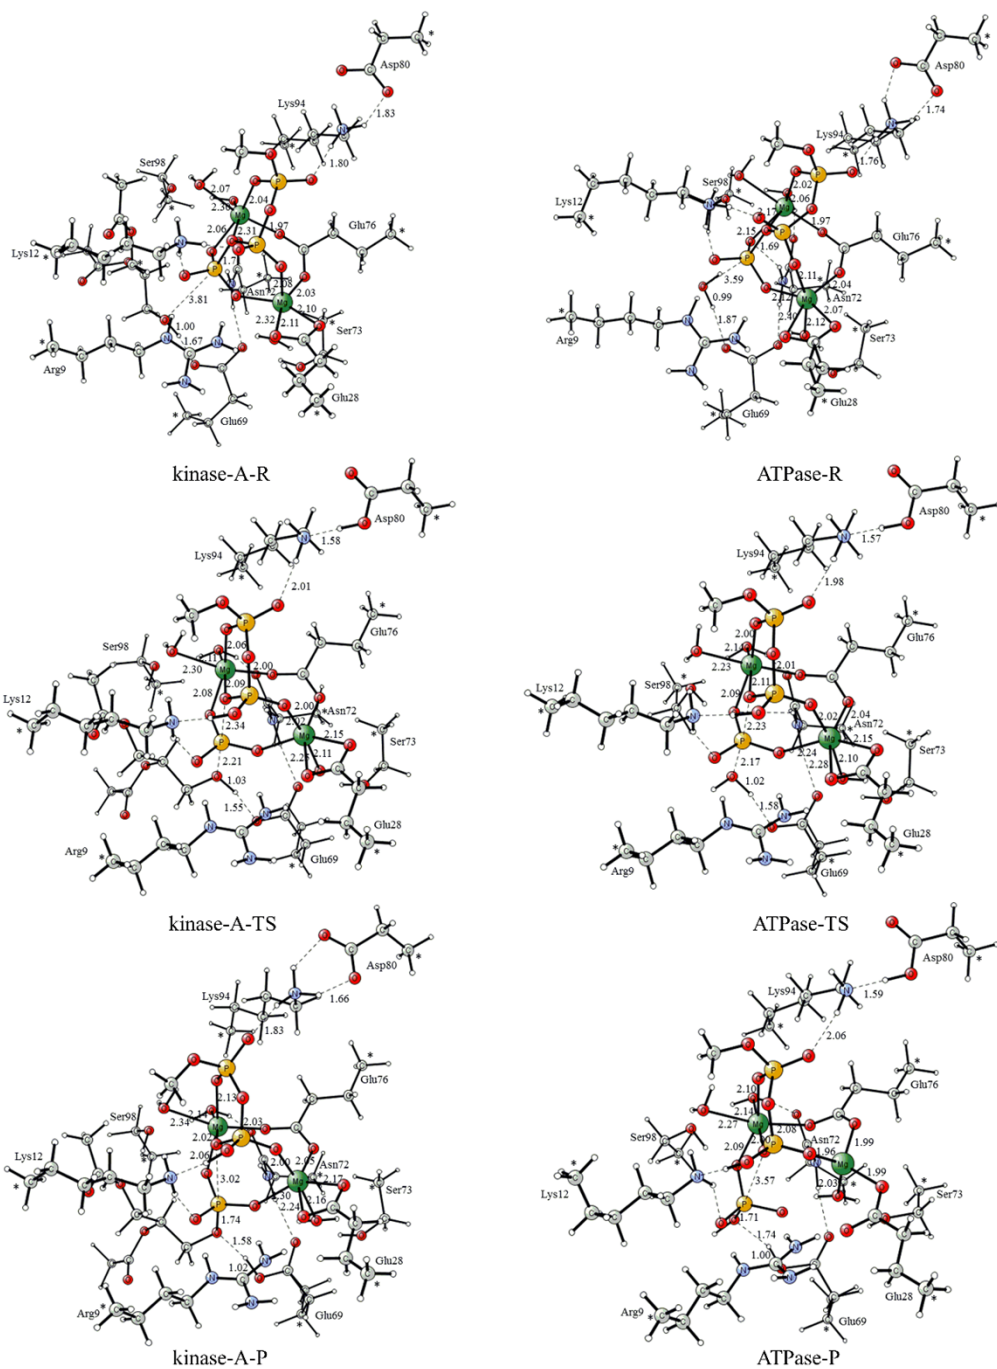

Figure S4. Optimized structures of reactants (R), transition states (TS) and products (P). The left column represents the stationary points along the dissociative reaction path of DgkA kinase reaction in which the proton transfers from the substrate to conserved residue Glu69. The right column represents the stationary points along the reaction path of DgkA ATPase reaction.

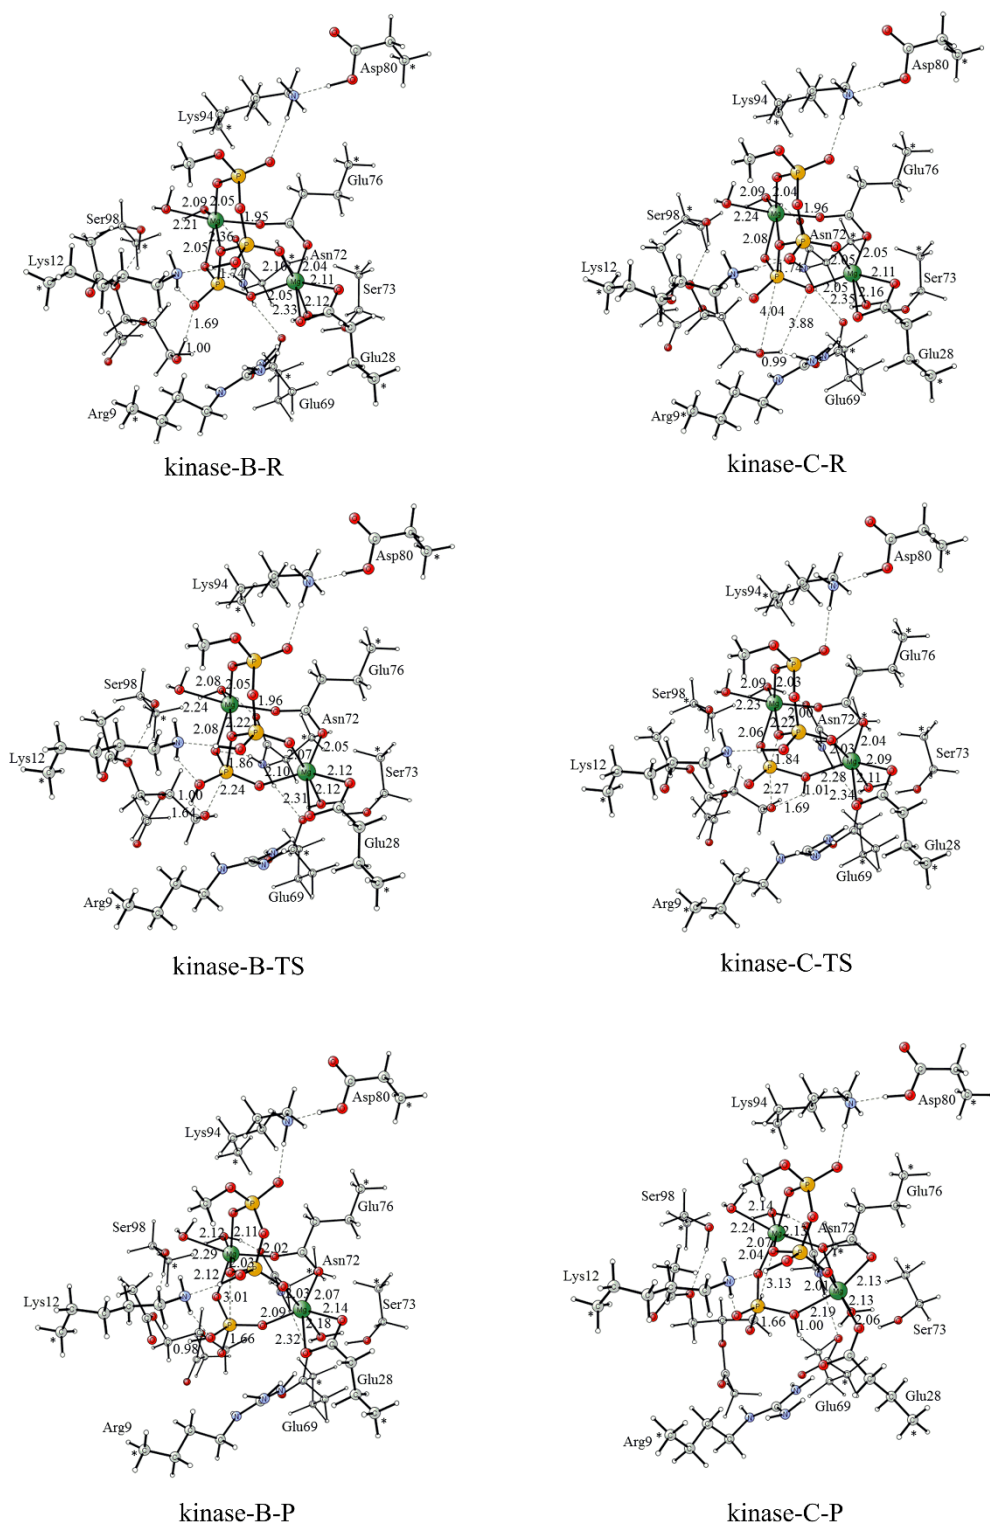

Figure S5. Optimized structures of reactants (R), transition states (TS) and products (P). The left column represents the stationary points along the reaction path of DgkA kinase reaction in which the proton of substrate DAG transfers to the non-coordinated oxygen  $O_{17}$ . The right column represents the stationary points along the reaction path of DgkA kinase reaction in which the proton of substrate DAG transfers to the coordinated oxygen  $O_{27}$ .

Cartesian coordinates of reactants, transition structures and products

Kinase reaction Path A

Kinase-A-R

|   |             |             |             |
|---|-------------|-------------|-------------|
| C | -8.39767100 | -3.04517400 | -1.88095000 |
| H | -8.59877900 | -2.94617900 | -2.95538000 |
| C | -7.78371300 | -1.76381000 | -1.30977600 |
| H | -7.62161700 | -1.88549300 | -0.23039200 |
| H | -8.49877000 | -0.93510300 | -1.41840700 |
| C | -6.45551200 | -1.38009600 | -1.97525200 |
| H | -6.60297800 | -1.25784900 | -3.05985300 |
| H | -5.73127100 | -2.19698600 | -1.85253600 |
| C | -5.86370400 | -0.09593500 | -1.38337400 |
| H | -5.69346200 | -0.20299100 | -0.30662500 |
| H | -6.55322500 | 0.74425200  | -1.51872300 |
| N | -4.56868600 | 0.26483100  | -1.96790500 |
| H | -3.73049600 | -0.19097000 | -1.57433200 |
| C | -4.32575100 | 1.38919700  | -2.65556900 |
| N | -5.35374400 | 2.01429100  | -3.31251900 |
| H | -5.11110000 | 2.82924800  | -3.85796700 |
| H | -6.07891100 | 1.43232100  | -3.70620900 |
| N | -3.11560100 | 1.90003800  | -2.68238600 |
| H | -2.40096500 | 1.59676600  | -1.99592300 |
| H | -2.78247900 | 2.65101800  | -3.29008000 |
| C | -5.25470900 | -6.09112100 | -3.13571400 |
| H | -5.70908800 | -7.07673100 | -2.97952000 |
| C | -4.55546600 | -6.02525100 | -4.49887800 |
| H | -5.27419000 | -6.28500900 | -5.28808000 |
| H | -3.76644800 | -6.79011300 | -4.54355100 |
| C | -3.94076200 | -4.65576600 | -4.83264200 |
| H | -4.73060700 | -3.89023600 | -4.82149600 |
| H | -3.55317400 | -4.68269800 | -5.86163300 |
| C | -2.81451900 | -4.23208000 | -3.87981600 |
| H | -2.07081500 | -5.04188500 | -3.81873300 |
| H | -3.19770500 | -4.09045900 | -2.86365400 |
| C | -2.11480700 | -2.95420300 | -4.33840300 |
| H | -2.82234400 | -2.12516000 | -4.43739800 |
| H | -1.62608900 | -3.09275900 | -5.30875300 |
| N | -1.08607000 | -2.50781800 | -3.36181500 |
| H | -0.43570800 | -1.73396300 | -3.74887200 |
| H | -0.49428900 | -3.28218200 | -3.05401500 |
| H | -1.52361600 | -2.06092100 | -2.49678800 |
| C | -1.77784900 | 6.34636400  | -6.58535000 |
| H | -0.90609400 | 6.26110500  | -7.24641200 |

|   |             |            |             |
|---|-------------|------------|-------------|
| C | -1.71118800 | 5.32223200 | -5.44810700 |
| H | -1.72191600 | 4.30482100 | -5.85663300 |
| H | -2.60860200 | 5.40854100 | -4.81997300 |
| C | -0.46849800 | 5.48906500 | -4.57154900 |
| H | -0.43723300 | 6.48745400 | -4.11670900 |
| H | 0.44135600  | 5.41602300 | -5.18414600 |
| C | -0.32521700 | 4.46518800 | -3.44840800 |
| O | -1.09354300 | 3.45578700 | -3.40283900 |
| O | 0.58741300  | 4.64214800 | -2.59086500 |
| C | -6.46451100 | 4.21106700 | 4.08697600  |
| H | -6.14138200 | 3.16643400 | 4.07865800  |
| C | -6.00661200 | 4.91553500 | 2.80543000  |
| H | -6.37230000 | 5.95237900 | 2.80755700  |
| H | -6.45818700 | 4.41825900 | 1.93926700  |
| C | -4.48542400 | 4.92859300 | 2.62656400  |
| H | -3.99328700 | 5.31688500 | 3.52958500  |
| H | -4.19309700 | 5.61770800 | 1.82288200  |
| C | -3.84540500 | 3.56875200 | 2.29711200  |
| O | -4.59575100 | 2.58238400 | 2.11516300  |
| O | -2.56639500 | 3.56084100 | 2.22159600  |
| C | 0.35692600  | 2.68975300 | 5.97329500  |
| H | 0.96191000  | 1.86787900 | 6.36553700  |
| C | -0.78822000 | 2.14084400 | 5.11857300  |
| H | -1.38138200 | 2.94703800 | 4.67380400  |
| H | -1.47244400 | 1.55972100 | 5.75350400  |
| C | -0.29702700 | 1.19693300 | 4.02353500  |
| O | 0.61796200  | 0.38060000 | 4.27714600  |
| N | -0.92570700 | 1.27965400 | 2.84889100  |
| H | -1.59215200 | 2.03421700 | 2.64296900  |
| H | -0.66522300 | 0.66254900 | 2.07482900  |
| C | 0.77351600  | 5.30207300 | 2.58693200  |
| H | 1.16344500  | 4.89532300 | 1.64853200  |
| C | -0.27992900 | 6.37472900 | 2.32477800  |
| H | 0.16282600  | 7.21606000 | 1.77896800  |
| H | -0.66050700 | 6.77483500 | 3.27988300  |
| O | -1.36068300 | 5.91273600 | 1.52307900  |
| H | -1.78420500 | 5.13117400 | 1.96454800  |
| C | 5.63832200  | 4.44096200 | 0.55915400  |
| H | 6.29488000  | 3.85231400 | -0.09421200 |
| C | 4.16599900  | 4.07916300 | 0.33723600  |
| H | 3.87573000  | 4.30327000 | -0.69497700 |
| H | 3.53081200  | 4.70996700 | 0.97122500  |
| C | 3.87608100  | 2.60473300 | 0.62454400  |
| H | 4.11367300  | 2.34854600 | 1.66698600  |

|   |             |             |             |
|---|-------------|-------------|-------------|
| H | 4.51039100  | 1.95710400  | 0.00310800  |
| C | 2.44524400  | 2.14866700  | 0.34983300  |
| O | 2.17994900  | 0.94042000  | 0.63112400  |
| O | 1.62800200  | 2.97157500  | -0.13766800 |
| C | 12.68577800 | -1.18409900 | -1.39193400 |
| H | 12.80299600 | -0.49948200 | -0.54479100 |
| C | 11.57866700 | -2.20243000 | -1.12247400 |
| H | 11.80878700 | -2.81787100 | -0.24300100 |
| H | 11.49434200 | -2.91086300 | -1.95897500 |
| C | 10.17912200 | -1.59052600 | -0.90847600 |
| O | 10.03574600 | -0.35492300 | -1.13226400 |
| O | 9.27799000  | -2.40501800 | -0.53117700 |
| C | 5.06513400  | -1.02526700 | 5.45989500  |
| H | 4.60816200  | -0.02987100 | 5.51591800  |
| C | 5.23516200  | -1.47064700 | 4.00326400  |
| H | 4.25048500  | -1.52113400 | 3.52128600  |
| H | 5.65168100  | -2.48868600 | 3.97809700  |
| C | 6.14591600  | -0.53768100 | 3.19420000  |
| H | 7.12754700  | -0.46752900 | 3.68815300  |
| H | 5.72158600  | 0.47694900  | 3.20612800  |
| C | 6.33624100  | -0.99006700 | 1.74049400  |
| H | 5.36394200  | -1.03268200 | 1.23446200  |
| H | 6.75641800  | -2.00557400 | 1.72068800  |
| C | 7.26911100  | -0.06197400 | 0.96420600  |
| H | 8.26745000  | -0.03958500 | 1.41269000  |
| H | 6.87780600  | 0.96023400  | 0.94588900  |
| N | 7.44746200  | -0.51135700 | -0.44115100 |
| H | 6.56269200  | -0.42722300 | -0.98165600 |
| H | 7.89020400  | -1.48541400 | -0.46369700 |
| H | 8.25844200  | -0.02009700 | -0.88579100 |
| C | -0.28758400 | -3.01626900 | 5.27892700  |
| H | -1.34820200 | -2.82171400 | 5.08893200  |
| C | 0.25545400  | -4.05285800 | 4.30335700  |
| H | -0.29189800 | -5.00290300 | 4.38903500  |
| H | 1.31100400  | -4.26166000 | 4.50149400  |
| O | 0.21817100  | -3.60468400 | 2.93646400  |
| H | -0.70621800 | -3.48227200 | 2.63996400  |
| C | -3.31954600 | -1.79086400 | 2.55315700  |
| C | -4.33446800 | -0.63891100 | 2.49900100  |
| H | -2.31858600 | -1.36189600 | 2.62761500  |
| H | -4.19255100 | -0.02041100 | 3.39499100  |
| H | -5.35435100 | -1.04805500 | 2.52839700  |
| O | -4.11042900 | 0.10127200  | 1.32063300  |
| H | -4.17396300 | 1.07055200  | 1.55773300  |



|    |             |             |             |
|----|-------------|-------------|-------------|
| O  | -3.45138300 | -2.54206600 | 3.80480700  |
| C  | -4.53555900 | -3.30349200 | 4.06047700  |
| O  | -5.48322800 | -3.45514000 | 3.31876300  |
| C  | -4.40510700 | -3.95660100 | 5.42155700  |
| H  | -3.51863200 | -4.59901400 | 5.44993900  |
| H  | -5.29779400 | -4.54969100 | 5.62423600  |
| C  | -3.38206500 | -2.67278100 | 1.32181800  |
| O  | -2.37495100 | -3.72385400 | 1.46365500  |
| H  | -3.13115300 | -2.07303900 | 0.44542300  |
| H  | -4.35477000 | -3.14710300 | 1.20158000  |
| C  | -2.34475800 | -4.63392700 | 0.46496100  |
| C  | -1.21393600 | -5.62011700 | 0.63147600  |
| O  | -3.12918200 | -4.63307100 | -0.46206600 |
| H  | -1.08053900 | -5.90606700 | 1.67782900  |
| H  | -0.28582200 | -5.14503500 | 0.29338300  |
| Mg | 0.15505300  | 2.88254700  | -1.53248900 |
| Mg | 1.55065600  | -0.92281200 | 0.52332500  |
| C  | 3.63716100  | -3.37616800 | -3.08014000 |
| H  | 4.28379400  | -4.07609600 | -3.61575500 |
| H  | 3.15850000  | -3.90123800 | -2.24285500 |
| O  | 4.46867100  | -2.31818700 | -2.62011700 |
| P  | 3.83518800  | -1.08575300 | -1.77088900 |
| O  | 4.90820500  | -0.06536100 | -1.58229900 |
| O  | 3.11995200  | -1.67056300 | -0.54438600 |
| O  | 2.68409900  | -0.59648400 | -2.83634500 |
| P  | 1.19360200  | 0.05885100  | -2.88088900 |
| O  | 1.25702300  | 1.54647200  | -2.68619400 |
| O  | 0.49804300  | -0.53392500 | -4.08631800 |
| O  | 0.52810900  | -0.65459900 | -1.52748900 |
| P  | -0.91279600 | -0.21322700 | -0.72170800 |
| O  | -2.04672800 | -1.03551900 | -1.35806800 |
| O  | -0.48820400 | -0.64787900 | 0.69076300  |
| O  | -1.09030000 | 1.29361700  | -0.93682100 |
| O  | 1.76895400  | -1.30213900 | 2.54144400  |
| H  | 1.43573500  | -0.55506000 | 3.12029700  |
| H  | 1.18202400  | -2.05170000 | 2.77680300  |
| O  | 1.23974300  | -3.19523500 | 0.35679100  |
| H  | 2.16702200  | -3.20379700 | 0.04160600  |
| H  | 1.20869400  | -3.58001200 | 1.25345800  |
| O  | -1.26868100 | 3.94112000  | -0.38701600 |
| H  | -1.70261700 | 3.41229900  | 0.31019700  |
| H  | -1.07278800 | 4.79209900  | 0.06610400  |
| H  | -1.79526800 | 7.37286900  | -6.19743100 |
| H  | -2.67574200 | 6.20862600  | -7.20085500 |

|   |             |             |             |
|---|-------------|-------------|-------------|
| H | 12.44022600 | -0.57039500 | -2.26365300 |
| H | 13.65024000 | -1.67875100 | -1.56993800 |
| H | -7.55725000 | 4.23148900  | 4.18642100  |
| H | -6.04152800 | 4.69583000  | 4.97735200  |
| H | -4.56439900 | -5.90614200 | -2.30646800 |
| H | -6.05664700 | -5.34443300 | -3.07131900 |
| H | -0.18293800 | -3.38230600 | 6.30807700  |
| H | 0.25068100  | -2.06666700 | 5.19110200  |
| H | -9.34475500 | -3.28854600 | -1.38581600 |
| H | -7.72322400 | -3.89937700 | -1.74629700 |
| H | 6.03111800  | -0.97898000 | 5.97987400  |
| H | -0.03059200 | 3.27753700  | 6.81318000  |
| H | 1.01472500  | 3.33674100  | 5.38242900  |
| H | 1.60958500  | 5.71500100  | 3.16659300  |
| H | 0.34600600  | 4.46866200  | 3.15635900  |
| H | 2.86634400  | -2.99611500 | -3.76096000 |
| H | 5.82579300  | 5.50092100  | 0.34820100  |
| H | 5.94766900  | 4.24949600  | 1.59561200  |
| H | 4.41918700  | -1.71498300 | 6.01649100  |
| H | -4.27929900 | -3.19321400 | 6.19607800  |
| H | -1.41469900 | -6.50154200 | 0.02016300  |

Kinase-A-TS

|   |            |             |            |
|---|------------|-------------|------------|
| C | 7.83843900 | -2.53847200 | 4.01128200 |
| H | 7.54524600 | -2.40446300 | 5.05992200 |
| C | 7.62189800 | -1.25590900 | 3.20545100 |
| H | 7.95599600 | -1.41267500 | 2.17046600 |
| H | 8.25468800 | -0.45339100 | 3.61180800 |
| C | 6.15919400 | -0.79842600 | 3.19631700 |
| H | 5.81477000 | -0.63050300 | 4.22818100 |
| H | 5.52067500 | -1.59344500 | 2.78926600 |
| C | 5.95239100 | 0.47360600  | 2.36309300 |
| H | 6.31534300 | 0.30169800  | 1.34272300 |
| H | 6.53702500 | 1.30622700  | 2.77004800 |
| N | 4.56098400 | 0.89127000  | 2.26017000 |
| H | 3.93376200 | 0.36351500  | 1.62166500 |
| C | 3.97997200 | 1.84437500  | 2.99234900 |
| N | 4.60830100 | 2.32188300  | 4.11491900 |
| H | 4.08891600 | 3.01863100  | 4.63372900 |
| H | 5.08903100 | 1.64456400  | 4.69117000 |
| N | 2.84242100 | 2.39880300  | 2.61194700 |
| H | 2.39683400 | 2.07394200  | 1.74655200 |
| H | 2.12196400 | 2.67207200  | 3.30085000 |
| C | 5.22768800 | -7.60375900 | 0.94776500 |

|   |             |             |             |
|---|-------------|-------------|-------------|
| H | 5.41769500  | -8.54634700 | 0.42021200  |
| C | 4.20703700  | -7.79754100 | 2.07377500  |
| H | 4.58070300  | -8.56284600 | 2.76863500  |
| H | 3.27175000  | -8.19773100 | 1.65627700  |
| C | 3.88989200  | -6.52028100 | 2.86866500  |
| H | 4.82418100  | -6.10614800 | 3.27822600  |
| H | 3.27445900  | -6.79496000 | 3.73815500  |
| C | 3.15332500  | -5.43324300 | 2.07092800  |
| H | 2.27786400  | -5.88475600 | 1.57804800  |
| H | 3.78362400  | -5.03256000 | 1.26819100  |
| C | 2.66071300  | -4.28711400 | 2.96564500  |
| H | 3.51077600  | -3.79001800 | 3.45072700  |
| H | 2.04980000  | -4.70839300 | 3.77663300  |
| N | 1.86449900  | -3.25407500 | 2.29084400  |
| H | 0.78668000  | -2.32612700 | 3.14290900  |
| H | 1.23593700  | -3.66195700 | 1.59920900  |
| H | 2.42265500  | -2.56893500 | 1.77502800  |
| C | 1.09635000  | 4.70985900  | 7.44299800  |
| H | 0.62609600  | 4.06158800  | 8.19317300  |
| C | 1.03113900  | 4.08024200  | 6.05157500  |
| H | 1.57269000  | 3.12645800  | 6.04329100  |
| H | 1.53718500  | 4.73516900  | 5.32761800  |
| C | -0.40177100 | 3.82290800  | 5.57642000  |
| H | -0.98224700 | 4.75149200  | 5.53676700  |
| H | -0.91819500 | 3.16591800  | 6.29149800  |
| C | -0.48213000 | 3.14912900  | 4.21117000  |
| O | 0.48912800  | 2.41152300  | 3.83116000  |
| O | -1.50289000 | 3.30757500  | 3.49466500  |
| C | 2.92851200  | 6.60062400  | -3.16986500 |
| H | 2.53052600  | 5.60154600  | -3.37308600 |
| C | 3.89390000  | 6.58609400  | -1.98061100 |
| H | 4.30517600  | 7.59339000  | -1.82845600 |
| H | 4.74413000  | 5.92775500  | -2.20117900 |
| C | 3.23672200  | 6.11298600  | -0.66964100 |
| H | 2.40710100  | 6.77471700  | -0.39932100 |
| H | 3.97818300  | 6.13265800  | 0.13648600  |
| C | 2.71768200  | 4.68215200  | -0.81662800 |
| O | 3.55832800  | 3.75360400  | -0.70414600 |
| O | 1.47688300  | 4.52772900  | -1.08694500 |
| C | -1.19841500 | 4.71938600  | -4.40455100 |
| H | -2.20699600 | 4.35655800  | -4.63030500 |
| C | -0.16742700 | 3.58124500  | -4.53842300 |
| H | 0.82712100  | 3.95596000  | -4.26728200 |
| H | -0.12923000 | 3.23093500  | -5.57435100 |

|   |              |             |             |
|---|--------------|-------------|-------------|
| C | -0.51737900  | 2.37154500  | -3.67204800 |
| O | -1.15950200  | 1.41836100  | -4.15606300 |
| N | -0.13242800  | 2.43539900  | -2.39054800 |
| H | 0.48487600   | 3.16328700  | -2.02704700 |
| H | -0.38474900  | 1.67845400  | -1.75860300 |
| C | -2.43327800  | 6.03257000  | -0.92648300 |
| H | -2.87759700  | 5.82125500  | 0.05190200  |
| C | -1.22582700  | 6.95503700  | -0.77545700 |
| H | -1.53126700  | 7.89294700  | -0.29404300 |
| H | -0.82310200  | 7.22145100  | -1.76614000 |
| O | -0.20177700  | 6.39456500  | 0.03783300  |
| H | 0.36185100   | 5.80426900  | -0.51873200 |
| C | -6.13256900  | 2.77268800  | -1.13762800 |
| H | -6.76041600  | 1.93230200  | -0.81480300 |
| C | -4.75919000  | 2.73326600  | -0.46314200 |
| H | -4.86519000  | 2.83089100  | 0.62291000  |
| H | -4.16615100  | 3.59740800  | -0.78606900 |
| C | -3.99268100  | 1.44860400  | -0.78076000 |
| H | -3.94190800  | 1.27637800  | -1.86401500 |
| H | -4.50508200  | 0.57154800  | -0.35878700 |
| C | -2.56776900  | 1.40014000  | -0.24825600 |
| O | -1.81135600  | 0.49131800  | -0.71564400 |
| O | -2.20021500  | 2.25242400  | 0.60076500  |
| C | -11.12851900 | 0.95074900  | 1.23792800  |
| H | -10.97205400 | 1.01052800  | 0.15464200  |
| C | -11.51812700 | -0.47577300 | 1.65790000  |
| H | -12.44579100 | -0.79061500 | 1.17088200  |
| H | -11.67145600 | -0.50633600 | 2.74429300  |
| C | -10.43189300 | -1.48061300 | 1.29108000  |
| O | -9.29925200  | -1.23916200 | 1.93294700  |
| O | -10.60316700 | -2.37571700 | 0.47371900  |
| C | -4.50768800  | -1.59211900 | -4.76482000 |
| H | -4.23380900  | -0.58237500 | -4.43824700 |
| C | -4.86202200  | -2.47554600 | -3.56892300 |
| H | -3.99456800  | -2.53425400 | -2.89946900 |
| H | -5.06879300  | -3.50196400 | -3.90883600 |
| C | -6.06097900  | -1.94764000 | -2.77223400 |
| H | -6.96432200  | -1.95401400 | -3.40215500 |
| H | -5.87195700  | -0.89446400 | -2.51809700 |
| C | -6.29895100  | -2.72511000 | -1.47395100 |
| H | -5.35588000  | -2.76907100 | -0.92117200 |
| H | -6.59366300  | -3.76213700 | -1.69974000 |
| C | -7.34159100  | -2.07549000 | -0.55890900 |
| H | -8.35763400  | -2.18935900 | -0.95339300 |

|    |             |             |             |
|----|-------------|-------------|-------------|
| H  | -7.13955800 | -0.99979300 | -0.48767800 |
| N  | -7.33801400 | -2.59012400 | 0.82696600  |
| H  | -6.39674600 | -2.44614300 | 1.21390300  |
| H  | -7.51195300 | -3.59519400 | 0.81942900  |
| H  | -8.52200100 | -1.84562000 | 1.55841100  |
| C  | 1.59111500  | -1.13874800 | -6.05068000 |
| H  | 2.55694000  | -0.87211800 | -5.60766900 |
| C  | 1.11146300  | -2.49611800 | -5.54530700 |
| H  | 1.83074700  | -3.28653800 | -5.80776300 |
| H  | 0.15239200  | -2.76010900 | -6.00101700 |
| O  | 0.87143200  | -2.51461700 | -4.13115300 |
| H  | 1.71404900  | -2.39572900 | -3.64961200 |
| C  | 3.81534200  | -0.39411000 | -2.62592800 |
| C  | 4.15520100  | 0.82490100  | -1.74308200 |
| H  | 2.75186800  | -0.32767200 | -2.85493700 |
| H  | 4.55708400  | 1.62604300  | -2.37122200 |
| H  | 4.92300600  | 0.56833200  | -1.00163500 |
| O  | 2.96972200  | 1.29591500  | -1.11908600 |
| H  | 3.08427200  | 2.29238500  | -0.90639600 |
| O  | 4.44551200  | -0.33767400 | -3.94598500 |
| C  | 5.78822700  | -0.25293000 | -4.03244100 |
| O  | 6.53778000  | -0.19074800 | -3.07977600 |
| C  | 6.22812900  | -0.23957200 | -5.48016700 |
| H  | 5.88956200  | -1.14989300 | -5.98574600 |
| H  | 7.31545300  | -0.16957700 | -5.52837900 |
| C  | 4.10709200  | -1.71292900 | -1.93166100 |
| O  | 3.39431100  | -2.77888500 | -2.62530500 |
| H  | 3.74220900  | -1.66486700 | -0.90402600 |
| H  | 5.17304200  | -1.94290400 | -1.93045500 |
| C  | 3.55483300  | -4.01952800 | -2.09497600 |
| C  | 2.62344500  | -5.02408900 | -2.72499100 |
| O  | 4.33877400  | -4.25761700 | -1.20092000 |
| H  | 2.53162100  | -4.86934700 | -3.80301400 |
| H  | 1.62960600  | -4.89416100 | -2.28020500 |
| Mg | -0.67294500 | 2.07124300  | 1.93801900  |
| Mg | -0.88864300 | -1.27022900 | -0.91081000 |
| C  | -2.18037500 | -5.02056400 | 1.62536300  |
| H  | -2.55125900 | -6.02183600 | 1.86331200  |
| H  | -1.60112700 | -5.06721500 | 0.69370600  |
| O  | -3.31771400 | -4.17862500 | 1.49061800  |
| P  | -3.12651400 | -2.61020100 | 1.07892200  |
| O  | -4.45020300 | -1.93791100 | 1.18633600  |
| O  | -2.35137000 | -2.56191700 | -0.24850700 |
| O  | -2.10000500 | -2.14843200 | 2.28580700  |

|            |              |             |             |
|------------|--------------|-------------|-------------|
| P          | -0.81977600  | -1.13006300 | 2.32779300  |
| O          | -1.29003700  | 0.27024700  | 2.62095000  |
| O          | 0.04943400   | -1.71871800 | 3.51777600  |
| O          | -0.04986800  | -1.33686500 | 1.00006200  |
| P          | 1.60651900   | 0.04846500  | 0.09741600  |
| O          | 2.76141000   | -0.65154500 | 0.78872600  |
| O          | 1.02844400   | -0.51257200 | -1.18707000 |
| O          | 1.02399100   | 1.29251100  | 0.74807000  |
| O          | -1.24535600  | -1.08920400 | -2.98682900 |
| H          | -1.36981700  | -0.14713900 | -3.27558500 |
| H          | -0.46389900  | -1.39903000 | -3.48928100 |
| O          | -0.24504000  | -3.37739100 | -1.57414300 |
| H          | -1.15453600  | -3.59040000 | -1.26942400 |
| H          | -0.25843700  | -3.35502400 | -2.54793000 |
| O          | 0.24212300   | 3.86094300  | 1.28857000  |
| H          | 0.71475400   | 3.80938200  | 0.43016000  |
| H          | -0.28360200  | 4.68070000  | 1.21108600  |
| H          | 0.57268100   | 5.67368900  | 7.46863900  |
| H          | 2.13179300   | 4.88785800  | 7.76028200  |
| H          | -10.20062100 | 1.25362300  | 1.73065000  |
| H          | -11.91482000 | 1.66727600  | 1.50409700  |
| H          | 3.42679500   | 6.95842900  | -4.07941200 |
| H          | 2.07282400   | 7.25902500  | -2.97549200 |
| H          | 4.88883500   | -6.86802300 | 0.20970800  |
| H          | 6.18670300   | -7.24815900 | 1.34653100  |
| H          | 1.70793800   | -1.16165300 | -7.14136500 |
| H          | 0.86532600   | -0.35830900 | -5.79528000 |
| H          | 8.89009400   | -2.84667600 | 3.99637200  |
| H          | 7.24298000   | -3.36460900 | 3.60467100  |
| H          | -5.35166000  | -1.50238400 | -5.46240500 |
| H          | -0.96388500  | 5.53297700  | -5.10060600 |
| H          | -1.20138000  | 5.12895500  | -3.39148800 |
| H          | -3.20012000  | 6.48967100  | -1.56551600 |
| H          | -2.14380900  | 5.07222800  | -1.36536700 |
| H          | -1.53031300  | -4.67230500 | 2.43671100  |
| H          | -6.67085800  | 3.69820600  | -0.89794000 |
| H          | -6.04233700  | 2.71362900  | -2.23026700 |
| H          | 2.98637100   | -6.03120200 | -2.51424100 |
| H          | 5.77610600   | 0.61051800  | -6.00160800 |
| H          | -3.65316500  | -1.99404500 | -5.32234200 |
| Kinase-A-P |              |             |             |
| C          | 7.91793200   | -2.17841100 | 3.98721800  |
| H          | 7.59829500   | -2.06597000 | 5.03060600  |

|   |             |             |            |
|---|-------------|-------------|------------|
| C | 7.66707000  | -0.89837700 | 3.18944800 |
| H | 8.02666000  | -1.03019800 | 2.15947100 |
| H | 8.25745700  | -0.07417900 | 3.61609300 |
| C | 6.18665600  | -0.50723500 | 3.15933500 |
| H | 5.81703200  | -0.37508800 | 4.18782600 |
| H | 5.59267200  | -1.32336500 | 2.72805300 |
| C | 5.93133400  | 0.76696900  | 2.34428000 |
| H | 6.31210500  | 0.62614000  | 1.32563000 |
| H | 6.47580300  | 1.61801300  | 2.77041500 |
| N | 4.52392900  | 1.11693300  | 2.23075900 |
| H | 3.92501300  | 0.57577200  | 1.55474000 |
| C | 3.87930500  | 1.97738800  | 3.01806800 |
| N | 4.48322200  | 2.45613600  | 4.15697100 |
| H | 3.89857400  | 3.05394800  | 4.72775300 |
| H | 5.03344800  | 1.79403600  | 4.68725800 |
| N | 2.69623100  | 2.45897200  | 2.67425600 |
| H | 2.23889200  | 2.11167900  | 1.81545700 |
| H | 1.97936400  | 2.66842100  | 3.38710600 |
| C | 5.53447700  | -7.35281400 | 0.92079300 |
| H | 5.63665600  | -8.35387500 | 0.48460200 |
| C | 4.64957200  | -7.38532100 | 2.17250600 |
| H | 5.09678300  | -8.07375800 | 2.90369200 |
| H | 3.66929400  | -7.81248100 | 1.91652300 |
| C | 4.43152700  | -6.02204600 | 2.85387100 |
| H | 5.40874000  | -5.55893600 | 3.06203600 |
| H | 3.96929100  | -6.20302300 | 3.83558600 |
| C | 3.54471200  | -5.03147600 | 2.07941700 |
| H | 2.63840900  | -5.55842700 | 1.74193000 |
| H | 4.04526600  | -4.66957400 | 1.17345200 |
| C | 3.10356800  | -3.84322600 | 2.95119300 |
| H | 3.97814100  | -3.26192600 | 3.27238400 |
| H | 2.65188800  | -4.24297600 | 3.87121100 |
| N | 2.14202500  | -2.92001400 | 2.33197300 |
| H | 0.82258500  | -2.28703200 | 3.20520800 |
| H | 1.55441700  | -3.39221400 | 1.64624300 |
| H | 2.56859200  | -2.14567600 | 1.81475500 |
| C | 0.85899600  | 4.74493600  | 7.45267300 |
| H | 0.44458200  | 4.08488000  | 8.22499300 |
| C | 0.81885600  | 4.07713000  | 6.07589000 |
| H | 1.42885600  | 3.16507100  | 6.08342600 |
| H | 1.26824600  | 4.74876500  | 5.33017400 |
| C | -0.59728400 | 3.70341100  | 5.62403600 |
| H | -1.24852400 | 4.58392200  | 5.58743900 |
| H | -1.04873500 | 3.01398100  | 6.35224100 |

|   |              |            |             |
|---|--------------|------------|-------------|
| C | -0.64884700  | 3.01533200 | 4.26251900  |
| O | 0.35488100   | 2.31919300 | 3.88570400  |
| O | -1.67374000  | 3.12355700 | 3.54437100  |
| C | 2.57115300   | 6.73830500 | -3.16145200 |
| H | 2.28432500   | 5.71733500 | -3.43137800 |
| C | 3.50360800   | 6.76692800 | -1.94634600 |
| H | 3.82183500   | 7.79790300 | -1.74740000 |
| H | 4.41417900   | 6.19348600 | -2.16133300 |
| C | 2.85587500   | 6.21364900 | -0.65661300 |
| H | 1.98643700   | 6.81476200 | -0.37426100 |
| H | 3.58124900   | 6.23154300 | 0.16214400  |
| C | 2.38504800   | 4.79574700 | -0.87316900 |
| O | 3.31176300   | 3.88779800 | -0.67080700 |
| O | 1.24060400   | 4.53377100 | -1.26509200 |
| C | -1.46827100  | 4.67120500 | -4.38830800 |
| H | -2.53160400  | 4.42078400 | -4.31264200 |
| C | -0.63324400  | 3.42640800 | -4.74509100 |
| H | 0.43390000   | 3.68664600 | -4.73516400 |
| H | -0.88321200  | 3.07903100 | -5.75114100 |
| C | -0.87780400  | 2.24147800 | -3.80844800 |
| O | -1.52547700  | 1.25694100 | -4.20362000 |
| N | -0.38594500  | 2.34750100 | -2.56287500 |
| H | 0.23201500   | 3.09667500 | -2.27111700 |
| H | -0.54054200  | 1.59054200 | -1.89765000 |
| C | -2.75220100  | 5.91946200 | -0.90410600 |
| H | -3.08626600  | 5.36495500 | -0.02147300 |
| C | -1.65337300  | 6.90542600 | -0.52766500 |
| H | -2.01948600  | 7.61565700 | 0.22164100  |
| H | -1.34178400  | 7.49383900 | -1.40620800 |
| O | -0.52048600  | 6.26946600 | 0.06389100  |
| H | -0.05711800  | 5.74276800 | -0.61907900 |
| C | -6.29792300  | 2.49294700 | -1.11143400 |
| H | -6.79837000  | 1.52170600 | -1.01923500 |
| C | -4.94772200  | 2.49736500 | -0.37857200 |
| H | -5.10180400  | 2.30674000 | 0.68989900  |
| H | -4.49324100  | 3.49285900 | -0.44262400 |
| C | -3.97767300  | 1.45709900 | -0.94117100 |
| H | -3.78705500  | 1.63293800 | -2.01017800 |
| H | -4.42315800  | 0.45683500 | -0.89568100 |
| C | -2.61138300  | 1.34613800 | -0.26678400 |
| O | -1.85168800  | 0.42456000 | -0.69687700 |
| O | -2.28984300  | 2.17176800 | 0.62867400  |
| C | -11.19767500 | 0.43817400 | 1.27450100  |
| H | -10.81433300 | 0.64456200 | 0.26716800  |



|   |              |             |             |
|---|--------------|-------------|-------------|
| C | -11.27248200 | -1.07051800 | 1.53505000  |
| H | -11.91256100 | -1.57550500 | 0.80359300  |
| H | -11.70975500 | -1.24530500 | 2.52897900  |
| C | -9.87818200  | -1.72626300 | 1.51089500  |
| O | -8.97352100  | -1.11143500 | 2.16225500  |
| O | -9.74032500  | -2.79275900 | 0.84877600  |
| C | -4.48419900  | -1.78542600 | -4.75206100 |
| H | -3.51778700  | -1.51718100 | -4.31232200 |
| C | -5.32666800  | -2.59586700 | -3.76205100 |
| H | -4.78442900  | -3.51027900 | -3.48306600 |
| H | -6.26239400  | -2.92389900 | -4.23891700 |
| C | -5.64227900  | -1.79358100 | -2.49698100 |
| H | -6.24057500  | -0.91113400 | -2.77286000 |
| H | -4.69844500  | -1.41613400 | -2.08452900 |
| C | -6.35928400  | -2.58835500 | -1.40092800 |
| H | -5.69925400  | -3.39004300 | -1.05089200 |
| H | -7.27669200  | -3.05366400 | -1.78945600 |
| C | -6.70544500  | -1.69390600 | -0.21194600 |
| H | -7.54632900  | -1.03035900 | -0.43308200 |
| H | -5.84224600  | -1.08820000 | 0.07159600  |
| N | -7.07523500  | -2.47871300 | 0.99463400  |
| H | -6.22874900  | -2.95927300 | 1.34062100  |
| H | -7.90103200  | -3.08582800 | 0.79910500  |
| H | -7.55464500  | -1.84069500 | 1.70480500  |
| C | 1.58345900   | -1.04899600 | -6.05420900 |
| H | 2.53308100   | -0.77215500 | -5.58521800 |
| C | 1.11903500   | -2.42712900 | -5.59106900 |
| H | 1.86238300   | -3.19525400 | -5.85299500 |
| H | 0.17941300   | -2.69994800 | -6.08108900 |
| O | 0.84209500   | -2.48220400 | -4.18729800 |
| H | 1.67426700   | -2.39112900 | -3.68203800 |
| C | 3.69320800   | -0.32489500 | -2.70183800 |
| C | 3.96168700   | 0.90188200  | -1.79857200 |
| H | 2.63338700   | -0.31094000 | -2.95554600 |
| H | 4.36335200   | 1.71141200  | -2.41371800 |
| H | 4.69989200   | 0.66215100  | -1.02686200 |
| O | 2.76757900   | 1.41494000  | -1.20582200 |
| H | 2.96708800   | 2.94279700  | -0.84829400 |
| O | 4.35062500   | -0.21678400 | -4.00626400 |
| C | 5.68942100   | -0.06714500 | -4.06065600 |
| O | 6.40971000   | 0.04825300  | -3.09044200 |
| C | 6.16683900   | -0.06348300 | -5.49641900 |
| H | 5.96324600   | -1.03552500 | -5.95846500 |
| H | 7.23833800   | 0.13844300  | -5.52213100 |

|    |              |             |             |
|----|--------------|-------------|-------------|
| C  | 4.03732800   | -1.63918600 | -2.01986500 |
| O  | 3.35968500   | -2.72164900 | -2.71956200 |
| H  | 3.68023300   | -1.61023700 | -0.98873100 |
| H  | 5.11138400   | -1.82846100 | -2.02629900 |
| C  | 3.58814400   | -3.96647700 | -2.21866900 |
| C  | 2.66016200   | -4.98992100 | -2.82050300 |
| O  | 4.42277100   | -4.18824800 | -1.36821200 |
| H  | 2.53094900   | -4.83519500 | -3.89496600 |
| H  | 1.67795300   | -4.87991800 | -2.34447400 |
| Mg | -0.77073900  | 1.91836500  | 1.98648300  |
| Mg | -0.80722600  | -1.30958600 | -0.82840400 |
| C  | -1.06015400  | -4.94948400 | 1.66291100  |
| H  | -1.01432800  | -6.01810600 | 1.89442400  |
| H  | -0.43614400  | -4.75077000 | 0.78203500  |
| O  | -2.42848500  | -4.64625200 | 1.41690300  |
| P  | -2.93101400  | -3.13061700 | 1.07457000  |
| O  | -4.41420900  | -3.13455900 | 1.22546600  |
| O  | -2.32027500  | -2.69337000 | -0.26554500 |
| O  | -2.26761800  | -2.24131400 | 2.28707900  |
| P  | -0.89572800  | -1.33319800 | 2.32746200  |
| O  | -1.30777400  | 0.09443200  | 2.61529500  |
| O  | -0.08288400  | -1.96524600 | 3.55066100  |
| O  | -0.11597200  | -1.59537700 | 1.04472400  |
| P  | 1.81171800   | 0.39309000  | -0.16719000 |
| O  | 2.88526700   | -0.35291100 | 0.63926700  |
| O  | 1.01834800   | -0.41989700 | -1.19030300 |
| O  | 1.03369100   | 1.46365600  | 0.62738700  |
| O  | -1.27711000  | -1.19773100 | -2.91174900 |
| H  | -1.52053400  | -0.29029100 | -3.21905500 |
| H  | -0.50782000  | -1.45397600 | -3.46214200 |
| O  | -0.17927400  | -3.43630100 | -1.57862100 |
| H  | -1.07803500  | -3.60726500 | -1.20423200 |
| H  | -0.28687900  | -3.40000400 | -2.54460600 |
| O  | 0.09302100   | 3.79362100  | 1.34958300  |
| H  | 0.47964000   | 3.50363800  | 0.50513900  |
| H  | -0.45947300  | 4.57251300  | 1.14037400  |
| H  | 0.27089500   | 5.67115400  | 7.46304400  |
| H  | 1.88438700   | 5.00039500  | 7.74861400  |
| H  | -10.51361200 | 0.90157200  | 1.99020900  |
| H  | -12.18261300 | 0.91661000  | 1.36050100  |
| H  | 3.05771700   | 7.19102000  | -4.03317600 |
| H  | 1.64849100   | 7.29739700  | -2.96520600 |
| H  | 5.12692100   | -6.68859200 | 0.14991800  |
| H  | 6.54229600   | -6.99152300 | 1.16352700  |

|   |             |             |             |
|---|-------------|-------------|-------------|
| H | 1.72399600  | -1.04381100 | -7.14263900 |
| H | 0.83288000  | -0.29222700 | -5.79965900 |
| H | 8.98079200  | -2.44622700 | 3.99185100  |
| H | 7.36324300  | -3.02312700 | 3.56163600  |
| H | -4.99309500 | -0.85524500 | -5.03607800 |
| H | -1.35427000 | 5.44270200  | -5.15841200 |
| H | -1.14894400 | 5.09949100  | -3.43420300 |
| H | -3.61463800 | 6.44347600  | -1.33513900 |
| H | -2.39832200 | 5.18741100  | -1.63647900 |
| H | -0.67943300 | -4.38018200 | 2.51768600  |
| H | -6.97497100 | 3.25199300  | -0.70187100 |
| H | -6.17151800 | 2.69881100  | -2.18266600 |
| H | 3.05137600  | -5.98923900 | -2.62419500 |
| H | 5.62662000  | 0.69221900  | -6.07526400 |
| H | -4.29130300 | -2.35045400 | -5.67350100 |

#### Kinase reaction Path B

##### Kinase-B-R

|   |             |             |             |
|---|-------------|-------------|-------------|
| C | -7.82030900 | -2.62175000 | -3.76544000 |
| H | -6.98284900 | -3.21443100 | -4.15395800 |
| C | -7.54689100 | -1.11843100 | -3.89748200 |
| H | -8.42213600 | -0.56189000 | -3.53226700 |
| H | -7.44766200 | -0.85860000 | -4.96174900 |
| C | -6.30109400 | -0.63500300 | -3.13856000 |
| H | -5.40381600 | -1.14703600 | -3.51572300 |
| H | -6.37590000 | -0.89407800 | -2.07458100 |
| C | -6.12474900 | 0.88869000  | -3.26033100 |
| H | -7.06612500 | 1.37459200  | -2.96982100 |
| H | -5.93598500 | 1.18023800  | -4.29893700 |
| N | -5.07202300 | 1.45729800  | -2.42965800 |
| H | -5.16019700 | 1.33231900  | -1.41518900 |
| C | -3.85746600 | 1.85441500  | -2.86051900 |
| N | -3.41811500 | 1.53414000  | -4.10769100 |
| H | -2.41330400 | 1.73585000  | -4.25314400 |
| H | -3.70478800 | 0.62383600  | -4.44332900 |
| N | -3.11146200 | 2.63441600  | -2.09717600 |
| H | -3.41668000 | 2.96885400  | -1.17270100 |
| H | -2.11671000 | 2.70438200  | -2.30599700 |
| C | -5.14611500 | -7.61628700 | -0.64108700 |
| H | -5.29170300 | -8.57482000 | -0.12822700 |
| C | -4.30890700 | -7.79589700 | -1.91152900 |
| H | -4.80924300 | -8.51594600 | -2.57400900 |
| H | -3.33944200 | -8.24591100 | -1.65184000 |

|   |             |             |             |
|---|-------------|-------------|-------------|
| C | -4.05700900 | -6.49614300 | -2.69206200 |
| H | -5.02002400 | -6.04927300 | -2.98061400 |
| H | -3.54159300 | -6.74568700 | -3.63130000 |
| C | -3.22075700 | -5.46157600 | -1.92540700 |
| H | -2.33423400 | -5.96416200 | -1.50582000 |
| H | -3.78012100 | -5.05940100 | -1.07264100 |
| C | -2.73554800 | -4.30943100 | -2.81115800 |
| H | -3.58471900 | -3.75277300 | -3.22507800 |
| H | -2.18005600 | -4.71744000 | -3.66653300 |
| N | -1.86404100 | -3.34671600 | -2.11455100 |
| H | -0.88120800 | -2.55441200 | -2.91090100 |
| H | -1.27713600 | -3.82630400 | -1.43077400 |
| H | -2.37432000 | -2.62689100 | -1.58203800 |
| C | -1.15475200 | 4.56858900  | -7.45860200 |
| H | -1.29004900 | 3.69876900  | -8.11442600 |
| C | -1.02045200 | 4.14175600  | -5.99704500 |
| H | -1.93571900 | 3.63313600  | -5.67349900 |
| H | -0.91984100 | 5.03056000  | -5.35979200 |
| C | 0.18319300  | 3.21636500  | -5.76625700 |
| H | 1.11733700  | 3.71925300  | -6.03509900 |
| H | 0.08697600  | 2.32850600  | -6.40734100 |
| C | 0.28349600  | 2.73843500  | -4.32610500 |
| O | -0.70867900 | 2.12018400  | -3.80974600 |
| O | 1.33359700  | 2.95415400  | -3.66443500 |
| C | -2.81578000 | 6.67588500  | 3.14162000  |
| H | -2.47848500 | 5.65494200  | 3.33766500  |
| C | -3.82992300 | 6.71492900  | 1.99259900  |
| H | -4.21942700 | 7.73704700  | 1.88591000  |
| H | -4.69032500 | 6.07770900  | 2.23709700  |
| C | -3.25674900 | 6.26769700  | 0.63333000  |
| H | -2.40192800 | 6.89869000  | 0.36340600  |
| H | -4.02985700 | 6.38462500  | -0.13415500 |
| C | -2.81455200 | 4.79695200  | 0.63735200  |
| O | -3.66842900 | 3.91734000  | 0.39705100  |
| O | -1.57409400 | 4.57518500  | 0.91192900  |
| C | 1.33585900  | 4.82998600  | 4.34642300  |
| H | 1.92300400  | 4.25193200  | 5.06715400  |
| C | 0.04685900  | 4.08325800  | 3.98090200  |
| H | -0.52597900 | 4.65376900  | 3.24572500  |
| H | -0.58171400 | 3.99301100  | 4.87850500  |
| C | 0.25044200  | 2.65879900  | 3.45732900  |
| O | 1.00026500  | 1.85802400  | 4.05849100  |
| N | -0.47123300 | 2.34357400  | 2.37636800  |
| H | -0.99122600 | 3.05920700  | 1.85843700  |

|   |             |             |             |
|---|-------------|-------------|-------------|
| H | -0.42683600 | 1.40907100  | 1.96533500  |
| C | 2.50957000  | 6.07323700  | 0.82177700  |
| H | 2.97148500  | 5.90200500  | -0.15644700 |
| C | 1.24210700  | 6.91505400  | 0.67328300  |
| H | 1.49473800  | 7.88269800  | 0.21897500  |
| H | 0.81419600  | 7.13072200  | 1.66474800  |
| O | 0.26485900  | 6.30646300  | -0.16300400 |
| H | -0.35926200 | 5.77560800  | 0.38996400  |
| C | 6.22023500  | 2.82674300  | 1.03916200  |
| H | 6.84989900  | 1.97240600  | 0.75914900  |
| C | 4.85806300  | 2.76445200  | 0.34465100  |
| H | 4.98148200  | 2.81240600  | -0.74302300 |
| H | 4.26063500  | 3.64176300  | 0.61984900  |
| C | 4.09415100  | 1.49392500  | 0.71091700  |
| H | 4.01101700  | 1.38780800  | 1.80092600  |
| H | 4.63244800  | 0.60124600  | 0.36100800  |
| C | 2.69069500  | 1.37460800  | 0.13609900  |
| O | 1.97726800  | 0.42987600  | 0.58774500  |
| O | 2.30892800  | 2.18483800  | -0.74815800 |
| C | 11.18087500 | 0.96692000  | -1.38066000 |
| H | 11.08760200 | 0.97793800  | -0.28858100 |
| C | 11.49025500 | -0.45029400 | -1.88997100 |
| H | 12.43160900 | -0.82137900 | -1.47410200 |
| H | 11.57753300 | -0.43370400 | -2.98367700 |
| C | 10.38830200 | -1.42784500 | -1.50176000 |
| O | 9.23666300  | -1.13180800 | -2.08664800 |
| O | 10.55994800 | -2.34742600 | -0.71226000 |
| C | 4.66696300  | -1.46519300 | 4.78278900  |
| H | 4.23162000  | -0.53776500 | 4.39526200  |
| C | 5.07822500  | -2.39420100 | 3.63925200  |
| H | 4.19847200  | -2.61168600 | 3.01885400  |
| H | 5.42394200  | -3.35823500 | 4.04216500  |
| C | 6.16673500  | -1.79117300 | 2.74303900  |
| H | 7.09949900  | -1.67204400 | 3.31550500  |
| H | 5.85451000  | -0.77874400 | 2.45008700  |
| C | 6.41322800  | -2.60839400 | 1.47069000  |
| H | 5.45320600  | -2.75528800 | 0.96692300  |
| H | 6.80060500  | -3.60708500 | 1.72631000  |
| C | 7.35992200  | -1.92092400 | 0.48063600  |
| H | 8.40038400  | -1.96917500 | 0.82103200  |
| H | 7.09194300  | -0.86089700 | 0.39812700  |
| N | 7.31145800  | -2.46929400 | -0.89041900 |
| H | 6.35331000  | -2.36225500 | -1.24310800 |
| H | 7.52306400  | -3.46676900 | -0.86964000 |

|    |             |             |             |
|----|-------------|-------------|-------------|
| H  | 8.46496100  | -1.72201900 | -1.68833300 |
| C  | -1.41085800 | -0.99877900 | 6.16008700  |
| H  | -2.28918300 | -0.53964500 | 5.69438500  |
| C  | -1.16100700 | -2.38107500 | 5.57740200  |
| H  | -2.00505100 | -3.05540700 | 5.77906800  |
| H  | -0.26330500 | -2.83346800 | 6.00961800  |
| O  | -0.91554200 | -2.32775600 | 4.16340500  |
| H  | -1.74725300 | -2.13433300 | 3.68757300  |
| C  | -4.06886400 | -0.41857000 | 2.33706800  |
| C  | -4.78216200 | 0.63457200  | 1.45685000  |
| H  | -2.99485300 | -0.37247900 | 2.13979300  |
| H  | -4.25592800 | 1.59246800  | 1.56313400  |
| H  | -5.81359600 | 0.76092900  | 1.79192200  |
| O  | -4.84507800 | 0.22932700  | 0.09490900  |
| H  | -3.94777500 | -0.10017400 | -0.19710800 |
| O  | -4.14956800 | -0.03332100 | 3.74787700  |
| C  | -5.33927400 | 0.00969500  | 4.38693100  |
| O  | -6.40423800 | -0.32782600 | 3.91307300  |
| C  | -5.16406800 | 0.53321000  | 5.79708200  |
| H  | -4.57144600 | -0.17073300 | 6.39110800  |
| H  | -6.14529200 | 0.65949100  | 6.25654800  |
| C  | -4.53530300 | -1.83733600 | 2.07119600  |
| O  | -3.58704100 | -2.76203200 | 2.68921300  |
| H  | -4.53417600 | -2.00849500 | 0.99629300  |
| H  | -5.52941500 | -2.03632200 | 2.47035300  |
| C  | -3.64834500 | -4.03683000 | 2.23149400  |
| C  | -2.57418000 | -4.90783300 | 2.83629600  |
| O  | -4.46286400 | -4.41214900 | 1.41418400  |
| H  | -2.47504100 | -4.73076100 | 3.91039300  |
| H  | -1.61369300 | -4.66668900 | 2.36719600  |
| Mg | 0.67406100  | 1.93179100  | -1.94612100 |
| Mg | 1.07822400  | -1.17768600 | 1.23258800  |
| C  | 2.40210300  | -5.17007000 | -1.06920300 |
| H  | 2.86688500  | -6.14939200 | -1.21276600 |
| H  | 1.91991200  | -5.14248100 | -0.08413700 |
| O  | 3.43943100  | -4.20228900 | -1.16820400 |
| P  | 3.13906600  | -2.62938800 | -0.87413600 |
| O  | 4.37364500  | -1.85338000 | -1.15498500 |
| O  | 2.42550700  | -2.52636800 | 0.47818800  |
| O  | 1.97131600  | -2.39907200 | -2.05323600 |
| P  | 0.82248400  | -1.29529000 | -2.28637800 |
| O  | 1.34609000  | 0.06307000  | -2.61721500 |
| O  | -0.12125000 | -1.92912100 | -3.35823300 |
| O  | 0.02608600  | -1.37488300 | -0.87533900 |

|   |             |             |             |
|---|-------------|-------------|-------------|
| P | -1.19174600 | -0.27473000 | -0.28477400 |
| O | -2.53158200 | -0.90782800 | -0.65056300 |
| O | -0.81838200 | -0.38908200 | 1.21231300  |
| O | -0.87824700 | 1.06262300  | -0.93175400 |
| O | 1.28106600  | -0.73270000 | 3.26149100  |
| H | 1.27170000  | 0.24784600  | 3.47296800  |
| H | 0.47708400  | -1.08615500 | 3.69225400  |
| O | 0.34662200  | -3.15754200 | 1.89297300  |
| H | 1.22845000  | -3.55109700 | 1.75807500  |
| H | 0.13483900  | -3.13855400 | 2.84803400  |
| O | -0.23696800 | 3.73980000  | -1.32695600 |
| H | -0.73873600 | 3.74745100  | -0.47828300 |
| H | 0.27266600  | 4.57329500  | -1.29073200 |
| H | -0.25944200 | 5.10208300  | -7.80202500 |
| H | -2.01473400 | 5.23345600  | -7.60577400 |
| H | 10.24006700 | 1.32888700  | -1.80447600 |
| H | 11.97895900 | 1.66614200  | -1.65704400 |
| H | -3.25390000 | 7.07059900  | 4.06710200  |
| H | -1.92899400 | 7.27775300  | 2.90709800  |
| H | -4.68339200 | -6.92216000 | 0.06830800  |
| H | -6.13945400 | -7.21597000 | -0.88108100 |
| H | -1.58030200 | -1.06230100 | 7.24202500  |
| H | -0.55445800 | -0.33956000 | 5.98089600  |
| H | -8.71972800 | -2.91086900 | -4.32117400 |
| H | -7.96676800 | -2.90585500 | -2.71665000 |
| H | 5.52752600  | -1.19907400 | 5.41118400  |
| H | 1.10023300  | 5.80452300  | 4.78840700  |
| H | 1.96173600  | 4.99862100  | 3.46521900  |
| H | 3.24023600  | 6.57583100  | 1.46883700  |
| H | 2.27887200  | 5.09246500  | 1.24994000  |
| H | 1.64531900  | -5.01209000 | -1.84654500 |
| H | 6.76683400  | 3.74018300  | 0.77349000  |
| H | 6.11159600  | 2.81034200  | 2.13154700  |
| H | -2.81816100 | -5.95446300 | 2.64848000  |
| H | -4.62578500 | 1.48575200  | 5.78538200  |
| H | 3.91389000  | -1.93165700 | 5.42973600  |

#### Kinase-B-TS

|   |             |             |             |
|---|-------------|-------------|-------------|
| C | -7.83760500 | -2.84914900 | -3.90868800 |
| H | -7.08931800 | -3.31031500 | -4.56494500 |
| C | -7.55586300 | -1.35419000 | -3.70587500 |
| H | -8.35080300 | -0.92165500 | -3.08150600 |
| H | -7.62304600 | -0.84019700 | -4.67585700 |
| C | -6.19443300 | -1.03118200 | -3.06429700 |

|   |             |             |             |
|---|-------------|-------------|-------------|
| H | -5.37819600 | -1.42604500 | -3.68578800 |
| H | -6.11115300 | -1.52943300 | -2.08879800 |
| C | -6.02942500 | 0.48787800  | -2.88060900 |
| H | -6.87998300 | 0.86040800  | -2.29231900 |
| H | -6.08826500 | 0.98306300  | -3.85628600 |
| N | -4.80857500 | 0.94692800  | -2.23030100 |
| H | -4.61097400 | 0.76593100  | -1.22889600 |
| C | -3.82866400 | 1.64354400  | -2.84486800 |
| N | -3.52998800 | 1.41637000  | -4.15767600 |
| H | -2.58776300 | 1.75901800  | -4.39996500 |
| H | -3.66857900 | 0.45302700  | -4.43869000 |
| N | -3.18693200 | 2.59026200  | -2.18915200 |
| H | -3.44555900 | 2.84076400  | -1.22528900 |
| H | -2.25001500 | 2.85183400  | -2.49525900 |
| C | -4.99711600 | -7.78037200 | -0.83087500 |
| H | -5.48502900 | -8.54737300 | -0.21722800 |
| C | -3.75309400 | -8.34371700 | -1.52634100 |
| H | -4.03929200 | -9.22641900 | -2.11494400 |
| H | -3.03817000 | -8.70143000 | -0.77089200 |
| C | -3.04824300 | -7.34048700 | -2.45224900 |
| H | -3.77020200 | -6.97212700 | -3.19688000 |
| H | -2.26655500 | -7.86537300 | -3.02066300 |
| C | -2.41558500 | -6.14651300 | -1.72486000 |
| H | -1.68853700 | -6.51791600 | -0.98543500 |
| H | -3.17215300 | -5.58978400 | -1.15757200 |
| C | -1.70061800 | -5.18622700 | -2.68180100 |
| H | -2.40954800 | -4.80098500 | -3.42518200 |
| H | -0.92556800 | -5.72489900 | -3.24279700 |
| N | -1.06915100 | -4.02613900 | -2.03823600 |
| H | -0.31454900 | -2.89206000 | -2.91278000 |
| H | -0.43012100 | -4.31998200 | -1.29917900 |
| H | -1.75241900 | -3.41253000 | -1.58542800 |
| C | -1.42596400 | 4.64384900  | -7.44646700 |
| H | -1.43226200 | 3.79029000  | -8.13661500 |
| C | -1.26948000 | 4.18115200  | -5.99991900 |
| H | -2.11832100 | 3.54488800  | -5.72711100 |
| H | -1.30611100 | 5.04766800  | -5.32598600 |
| C | 0.03759500  | 3.41210800  | -5.76473600 |
| H | 0.90769000  | 4.04761600  | -5.95707700 |
| H | 0.09062900  | 2.56265300  | -6.46124200 |
| C | 0.14024800  | 2.85371500  | -4.35414500 |
| O | -0.83489400 | 2.16625700  | -3.89423600 |
| O | 1.16916400  | 3.06719000  | -3.66089200 |
| C | -3.25063800 | 6.53638000  | 3.16735400  |



|   |             |             |             |
|---|-------------|-------------|-------------|
| H | -2.88068500 | 5.51870500  | 3.31765900  |
| C | -4.19504200 | 6.61102900  | 1.96217000  |
| H | -4.62459800 | 7.62067200  | 1.89853500  |
| H | -5.03682700 | 5.92139300  | 2.10750900  |
| C | -3.51919100 | 6.28104100  | 0.61756400  |
| H | -2.67363000 | 6.95674100  | 0.44499000  |
| H | -4.24596800 | 6.42821400  | -0.18928100 |
| C | -3.03197800 | 4.82622800  | 0.54296000  |
| O | -3.85312900 | 3.93943500  | 0.24568400  |
| O | -1.78248500 | 4.62417200  | 0.81299000  |
| C | 0.95960400  | 4.83504400  | 4.38156800  |
| H | 1.47353700  | 4.25514900  | 5.15480900  |
| C | -0.30780700 | 4.10860200  | 3.91778400  |
| H | -0.81429800 | 4.68496500  | 3.13952700  |
| H | -1.00582400 | 4.02877200  | 4.76351100  |
| C | -0.07920600 | 2.68238400  | 3.41360100  |
| O | 0.63183100  | 1.87975700  | 4.05501800  |
| N | -0.73982200 | 2.36779800  | 2.29173900  |
| H | -1.22607900 | 3.08598400  | 1.74439700  |
| H | -0.65500900 | 1.43929600  | 1.88305200  |
| C | 2.11213000  | 6.17201200  | 0.88434300  |
| H | 2.65504600  | 5.84501000  | -0.00860600 |
| C | 0.91860800  | 7.04323400  | 0.49319600  |
| H | 1.26757000  | 7.91526400  | -0.07503000 |
| H | 0.42222300  | 7.43025200  | 1.39796000  |
| O | -0.01949400 | 6.36727600  | -0.33285300 |
| H | -0.62682600 | 5.83573700  | 0.23873700  |
| C | 5.94363600  | 3.06814900  | 1.08830800  |
| H | 6.57444400  | 2.20603000  | 0.83697100  |
| C | 4.57844700  | 2.97784700  | 0.39529400  |
| H | 4.70454000  | 2.98638800  | -0.69310900 |
| H | 3.98193800  | 3.86535500  | 0.63857100  |
| C | 3.81156800  | 1.71971100  | 0.80267800  |
| H | 3.70332000  | 1.66297700  | 1.89409800  |
| H | 4.36537200  | 0.81778300  | 0.50457600  |
| C | 2.42245200  | 1.55103500  | 0.20135100  |
| O | 1.70540800  | 0.62460300  | 0.69190100  |
| O | 2.04718600  | 2.29735300  | -0.73957900 |
| C | 10.99135200 | 1.43502400  | -1.31501400 |
| H | 10.86742700 | 1.46836600  | -0.22645100 |
| C | 11.43347800 | 0.03565100  | -1.77355300 |
| H | 12.39042000 | -0.24301800 | -1.32269600 |
| H | 11.54969500 | 0.02892400  | -2.86472000 |
| C | 10.40536800 | -1.01811300 | -1.38351700 |

|   |             |             |             |
|---|-------------|-------------|-------------|
| O | 9.24710800  | -0.82807700 | -1.99911600 |
| O | 10.63140600 | -1.90189400 | -0.56751200 |
| C | 4.52791600  | -1.33263700 | 4.75940900  |
| H | 3.96085200  | -0.52203300 | 4.28933500  |
| C | 5.10018300  | -2.28200700 | 3.70442100  |
| H | 4.27804400  | -2.67302600 | 3.08987800  |
| H | 5.56999400  | -3.14970600 | 4.19209900  |
| C | 6.11263200  | -1.59528700 | 2.78096700  |
| H | 6.99327300  | -1.28080200 | 3.36216900  |
| H | 5.65616900  | -0.67546700 | 2.39026000  |
| C | 6.53819400  | -2.45995300 | 1.58965700  |
| H | 5.63622000  | -2.79832800 | 1.07047800  |
| H | 7.06298600  | -3.36314100 | 1.93792000  |
| C | 7.41345400  | -1.69944500 | 0.58283900  |
| H | 8.46001300  | -1.67430100 | 0.90527400  |
| H | 7.06518600  | -0.66357700 | 0.50808600  |
| N | 7.37910200  | -2.23951200 | -0.79224300 |
| H | 6.42112400  | -2.13047500 | -1.14193400 |
| H | 7.59482700  | -3.23617500 | -0.78021700 |
| H | 8.51071800  | -1.45458200 | -1.59318900 |
| C | -1.57404400 | -1.12013200 | 6.09178500  |
| H | -2.51442700 | -0.78975800 | 5.63725200  |
| C | -1.17320400 | -2.49308600 | 5.57120300  |
| H | -1.92196100 | -3.25267100 | 5.83690200  |
| H | -0.21519400 | -2.80874200 | 5.99522600  |
| O | -0.97701000 | -2.49140600 | 4.14733100  |
| H | -1.84173100 | -2.42496700 | 3.69310200  |
| C | -3.76995800 | -0.50525200 | 2.45014700  |
| C | -4.00866900 | 0.57324500  | 1.36207300  |
| H | -2.69057300 | -0.60880900 | 2.54257600  |
| H | -3.52746900 | 1.49767700  | 1.71249400  |
| H | -5.08714800 | 0.78151600  | 1.29498900  |
| O | -3.51895100 | 0.17512100  | 0.11568800  |
| H | -3.22501400 | -1.19057400 | -0.73586700 |
| O | -4.17017800 | -0.03251000 | 3.77877000  |
| C | -5.46615200 | 0.20716300  | 4.06269800  |
| O | -6.40265100 | -0.03388500 | 3.32861500  |
| C | -5.59692200 | 0.81742600  | 5.44292100  |
| H | -5.13067100 | 0.17135900  | 6.19404400  |
| H | -6.65258800 | 0.96026000  | 5.67745600  |
| C | -4.35507400 | -1.86292000 | 2.10239400  |
| O | -3.48939000 | -2.91048800 | 2.65541600  |
| H | -4.37063500 | -1.98187200 | 1.02059300  |
| H | -5.36160300 | -2.00865300 | 2.49224400  |

|    |             |             |             |
|----|-------------|-------------|-------------|
| C  | -3.54272200 | -4.11944700 | 2.04091200  |
| C  | -2.51674000 | -5.07463000 | 2.60185600  |
| O  | -4.30864400 | -4.37467100 | 1.13561600  |
| H  | -2.47083200 | -5.01498300 | 3.69264900  |
| H  | -1.52995000 | -4.80330900 | 2.20925700  |
| Mg | 0.46946100  | 1.94134700  | -2.00611300 |
| Mg | 0.94734600  | -1.11428800 | 1.19221500  |
| C  | 2.89789000  | -4.91552400 | -0.95377200 |
| H  | 3.47587500  | -5.82597800 | -1.13441700 |
| H  | 2.39900400  | -4.99587500 | 0.02037300  |
| O  | 3.81648900  | -3.83068100 | -0.97784700 |
| P  | 3.31209400  | -2.30874100 | -0.68439400 |
| O  | 4.46926400  | -1.39492200 | -0.86496700 |
| O  | 2.50082100  | -2.32096500 | 0.61697600  |
| O  | 2.20873000  | -2.18149100 | -1.92907900 |
| P  | 0.92332900  | -1.24571200 | -2.21889500 |
| O  | 1.27637100  | 0.14163900  | -2.64781600 |
| O  | 0.13598700  | -2.05106300 | -3.31808300 |
| O  | 0.10231700  | -1.34556900 | -0.84935800 |
| P  | -1.39646300 | -0.36711100 | -0.35828800 |
| O  | -2.32959300 | -1.50686100 | -1.05130600 |
| O  | -1.04604200 | -0.51818600 | 1.12569400  |
| O  | -1.13044300 | 0.90900900  | -1.11490300 |
| O  | 1.02686900  | -0.69027000 | 3.23090800  |
| H  | 0.96836400  | 0.28277100  | 3.46180800  |
| H  | 0.25081900  | -1.10728500 | 3.65514100  |
| O  | 0.36794600  | -3.17650000 | 1.83828800  |
| H  | 1.30247200  | -3.43951300 | 1.73300600  |
| H  | 0.14527100  | -3.16535000 | 2.79130000  |
| O  | -0.50465200 | 3.71660200  | -1.39050700 |
| H  | -0.99834700 | 3.78300200  | -0.53520300 |
| H  | 0.02534100  | 4.53805600  | -1.40054600 |
| H  | -0.60152300 | 5.30260200  | -7.74768300 |
| H  | -2.36216300 | 5.19654300  | -7.59221800 |
| H  | 10.03526200 | 1.70263200  | -1.77292000 |
| H  | 11.73463300 | 2.19196100  | -1.59216900 |
| H  | -3.75938800 | 6.84933800  | 4.08796400  |
| H  | -2.37915000 | 7.18814300  | 3.02757800  |
| H  | -4.76188800 | -6.93332300 | -0.17728600 |
| H  | -5.73166500 | -7.43191200 | -1.56833200 |
| H  | -1.70378900 | -1.14849100 | 7.18075300  |
| H  | -0.80706500 | -0.37422700 | 5.85550400  |
| H  | -8.82272200 | -3.00569100 | -4.36283200 |
| H  | -7.81785900 | -3.38915500 | -2.95442600 |

|   |             |             |             |
|---|-------------|-------------|-------------|
| H | 5.32553900  | -0.88245800 | 5.36529500  |
| H | 0.70660400  | 5.81890900  | 4.79213100  |
| H | 1.66093200  | 4.98274900  | 3.55554600  |
| H | 2.80564500  | 6.72163600  | 1.53411700  |
| H | 1.77868700  | 5.27278900  | 1.41159300  |
| H | 2.14308500  | -4.80618000 | -1.74180500 |
| H | 6.48576900  | 3.97385400  | 0.78962000  |
| H | 5.83526300  | 3.08927200  | 2.18064500  |
| H | -2.76494000 | -6.09018100 | 2.29012100  |
| H | -5.07622100 | 1.78023000  | 5.47240800  |
| H | 3.84578000  | -1.85342700 | 5.44306100  |

Kinase-B-P

|   |            |             |             |
|---|------------|-------------|-------------|
| C | 7.76408900 | -4.33939000 | 2.91184900  |
| H | 6.86697800 | -4.85432100 | 3.27595300  |
| C | 7.68213500 | -2.82807000 | 3.17164600  |
| H | 8.61572900 | -2.35478000 | 2.83431700  |
| H | 7.63161100 | -2.65249200 | 4.25605300  |
| C | 6.49395200 | -2.12041200 | 2.49571200  |
| H | 5.54764600 | -2.57329300 | 2.82247300  |
| H | 6.53707200 | -2.25746100 | 1.40710000  |
| C | 6.49298300 | -0.61663400 | 2.82500400  |
| H | 7.44998700 | -0.18079800 | 2.51063200  |
| H | 6.42461100 | -0.47431100 | 3.90896600  |
| N | 5.43113100 | 0.17871300  | 2.21146000  |
| H | 5.58739700 | 0.57400800  | 1.29381600  |
| C | 4.33348600 | 0.63506500  | 2.86084200  |
| N | 3.90486100 | -0.00689600 | 3.97720400  |
| H | 2.96869700 | 0.31083100  | 4.28946300  |
| H | 4.00375300 | -1.01384600 | 3.94888800  |
| N | 3.73020700 | 1.73860500  | 2.46307400  |
| H | 4.03434200 | 2.26693000  | 1.62928500  |
| H | 2.77262400 | 1.89789200  | 2.78412000  |
| C | 4.25476100 | -8.39488000 | -0.70698000 |
| H | 4.51513400 | -9.10203200 | -1.50319400 |
| C | 2.94704000 | -8.79947300 | -0.01553500 |
| H | 3.05781800 | -9.82196700 | 0.37148600  |
| H | 2.13870300 | -8.84457400 | -0.75947100 |
| C | 2.50759200 | -7.88684900 | 1.14356600  |
| H | 3.33028400 | -7.79857600 | 1.86906300  |
| H | 1.68882500 | -8.38993100 | 1.67826100  |
| C | 2.02307100 | -6.48245800 | 0.74307400  |
| H | 1.30050600 | -6.57225500 | -0.08274900 |
| H | 2.85201400 | -5.86736900 | 0.36675200  |

|   |             |             |             |
|---|-------------|-------------|-------------|
| C | 1.33374800  | -5.75601800 | 1.91369200  |
| H | 2.04120700  | -5.63319400 | 2.74390200  |
| H | 0.52644600  | -6.39680400 | 2.29418700  |
| N | 0.75775500  | -4.44023900 | 1.62383200  |
| H | -0.40497600 | -3.58250600 | 2.61613100  |
| H | 0.18370900  | -4.44783000 | 0.78129600  |
| H | 1.45833300  | -3.71628700 | 1.45910800  |
| C | 2.39756400  | 3.12372700  | 7.93900700  |
| H | 2.43231400  | 2.19719800  | 8.52646100  |
| C | 2.13674300  | 2.83094300  | 6.45887700  |
| H | 2.95347400  | 2.22469600  | 6.04925800  |
| H | 2.13759700  | 3.77244700  | 5.89335300  |
| C | 0.80255700  | 2.10411800  | 6.22578400  |
| H | -0.03271200 | 2.69577100  | 6.61320000  |
| H | 0.81106000  | 1.14661700  | 6.76530600  |
| C | 0.54293000  | 1.81059300  | 4.75486200  |
| O | 1.39524800  | 1.11006500  | 4.10130500  |
| O | -0.48890600 | 2.25645100  | 4.19563200  |
| C | 3.95873600  | 6.47847700  | -2.35043500 |
| H | 3.38997500  | 5.57580200  | -2.59684200 |
| C | 4.92795100  | 6.22118700  | -1.19036400 |
| H | 5.50292700  | 7.13730000  | -0.99649100 |
| H | 5.65829000  | 5.45235400  | -1.47572400 |
| C | 4.24699200  | 5.78642200  | 0.12316400  |
| H | 3.45488200  | 6.49444900  | 0.39172200  |
| H | 4.99566300  | 5.79493100  | 0.92308300  |
| C | 3.66190900  | 4.36482700  | 0.06675000  |
| O | 4.44095500  | 3.40945800  | 0.28893100  |
| O | 2.40947900  | 4.25937300  | -0.20775500 |
| C | -0.46527900 | 5.44067800  | -3.55299000 |
| H | -1.40674800 | 5.14973100  | -4.03050400 |
| C | 0.55923100  | 4.29495500  | -3.64601900 |
| H | 1.48643900  | 4.58415900  | -3.14024500 |
| H | 0.78943400  | 4.08849700  | -4.69650800 |
| C | 0.01273800  | 3.00654300  | -3.04032300 |
| O | -0.74895100 | 2.27707400  | -3.70065800 |
| N | 0.37370800  | 2.75283200  | -1.77055400 |
| H | 1.04617000  | 3.33432000  | -1.27128200 |
| H | -0.06759700 | 1.97779300  | -1.26971500 |
| C | -1.30615600 | 6.31760100  | 0.17129600  |
| H | -1.85483600 | 6.00769700  | 1.06699200  |
| C | 0.04592800  | 6.91534700  | 0.55689800  |
| H | -0.10691400 | 7.77361800  | 1.22429100  |
| H | 0.55972500  | 7.29768700  | -0.34026900 |

|   |              |             |             |
|---|--------------|-------------|-------------|
| O | 0.88072500   | 5.99732400  | 1.25022400  |
| H | 1.39408000   | 5.47238800  | 0.58994600  |
| C | -5.46805000  | 3.70273700  | -0.27276300 |
| H | -6.20145300  | 2.88986300  | -0.20602400 |
| C | -4.13075900  | 3.29805600  | 0.37093300  |
| H | -4.27504300  | 3.09403500  | 1.43772400  |
| H | -3.42980600  | 4.14067300  | 0.31713200  |
| C | -3.50183900  | 2.06700800  | -0.29194200 |
| H | -3.39706000  | 2.21226100  | -1.37541400 |
| H | -4.15577400  | 1.19109400  | -0.16733700 |
| C | -2.13281000  | 1.64970000  | 0.23600000  |
| O | -1.46306500  | 0.82655100  | -0.48219900 |
| O | -1.70029300  | 2.11761300  | 1.31805600  |
| C | -10.55782100 | 2.24424400  | 2.15406600  |
| H | -10.39684600 | 2.57056100  | 1.12005100  |
| C | -11.35831800 | 0.93266600  | 2.19702700  |
| H | -12.34183900 | 1.05313500  | 1.73305500  |
| H | -11.50581400 | 0.63037300  | 3.24199100  |
| C | -10.62704100 | -0.18716000 | 1.46505000  |
| O | -9.45847900  | -0.45590300 | 2.02486000  |
| O | -11.07608100 | -0.73216500 | 0.46502600  |
| C | -4.71848600  | -0.18194000 | -4.65404400 |
| H | -4.08203300  | 0.38405000  | -3.96561800 |
| C | -5.48909200  | -1.27441400 | -3.90828300 |
| H | -4.77271100  | -1.93304100 | -3.39953800 |
| H | -6.04395400  | -1.90083400 | -4.62371600 |
| C | -6.45014300  | -0.69935100 | -2.86346800 |
| H | -7.21795200  | -0.08801500 | -3.36379600 |
| H | -5.88564300  | -0.02284000 | -2.20886800 |
| C | -7.11005000  | -1.75841800 | -1.97343000 |
| H | -6.31669000  | -2.35423600 | -1.51048200 |
| H | -7.71889900  | -2.44726600 | -2.57938700 |
| C | -7.96094300  | -1.13346100 | -0.85134500 |
| H | -9.01411100  | -1.04277200 | -1.13680700 |
| H | -7.59413400  | -0.12350300 | -0.64064200 |
| N | -7.90408800  | -1.85149100 | 0.44010600  |
| H | -6.92502400  | -1.82059600 | 0.75088900  |
| H | -8.15389600  | -2.83157800 | 0.30852600  |
| H | -8.88068100  | -1.09895500 | 1.41989300  |
| C | 1.30458800   | -0.39843100 | -6.30632600 |
| H | 2.31054800   | -0.27621900 | -5.88976500 |
| C | 0.71783500   | -1.76130800 | -5.96012300 |
| H | 1.34333200   | -2.57175800 | -6.36292900 |
| H | -0.28130600  | -1.87139400 | -6.39209300 |

|    |             |             |             |
|----|-------------|-------------|-------------|
| O  | 0.54122300  | -1.94366700 | -4.54955600 |
| H  | 1.41621000  | -1.93924900 | -4.11633300 |
| C  | 3.35486700  | 0.19922100  | -2.91511300 |
| C  | 3.53278600  | 0.93900100  | -1.57635200 |
| H  | 2.29663800  | -0.01975500 | -3.04423300 |
| H  | 2.80626200  | 1.75114600  | -1.50981300 |
| H  | 4.52912000  | 1.37588400  | -1.50784100 |
| O  | 3.41901800  | 0.04261100  | -0.47215100 |
| H  | 3.06755900  | -2.30095900 | 0.24418800  |
| O  | 3.63679900  | 1.12826500  | -4.00309200 |
| C  | 4.91035000  | 1.53265500  | -4.20969200 |
| O  | 5.87685200  | 1.07635800  | -3.63434200 |
| C  | 4.95707100  | 2.63031500  | -5.24736000 |
| H  | 4.32743200  | 2.38158700  | -6.10633900 |
| H  | 5.98925800  | 2.79018000  | -5.56192900 |
| C  | 4.13837200  | -1.11980300 | -3.03861500 |
| O  | 3.20788900  | -2.22910600 | -3.24601800 |
| H  | 4.72490100  | -1.32972300 | -2.14672200 |
| H  | 4.78393100  | -1.12213600 | -3.91492700 |
| C  | 3.11079000  | -3.18732200 | -2.29280800 |
| C  | 2.08052700  | -4.22366900 | -2.64288600 |
| O  | 3.78308600  | -3.19734500 | -1.27650500 |
| H  | 1.97919800  | -4.34355800 | -3.72378200 |
| H  | 1.10936200  | -3.90399100 | -2.24222500 |
| Mg | -0.08479400 | 1.30345000  | 2.32775400  |
| Mg | -0.97668500 | -1.05660600 | -1.03487200 |
| C  | -3.39872900 | -4.57283500 | 0.69890100  |
| H  | -3.97111200 | -5.50180300 | 0.78136300  |
| H  | -2.73239800 | -4.64226700 | -0.17148200 |
| O  | -4.34290000 | -3.51849300 | 0.54620900  |
| P  | -3.83138000 | -1.97284300 | 0.37938200  |
| O  | -5.04220700 | -1.10388900 | 0.43371900  |
| O  | -2.89966400 | -1.90818200 | -0.84086000 |
| O  | -2.94057200 | -1.74762600 | 1.74453700  |
| P  | -1.32703600 | -1.71756000 | 2.04194100  |
| O  | -1.02143100 | -0.43705300 | 2.78390600  |
| O  | -1.12981400 | -2.99285900 | 2.99756000  |
| O  | -0.58685200 | -1.97414700 | 0.73142300  |
| P  | 1.94181000  | -0.47784100 | 0.07242200  |
| O  | 2.51955900  | -1.78054200 | 0.86812800  |
| O  | 1.12593500  | -0.84841700 | -1.16234000 |
| O  | 1.37085000  | 0.50230400  | 1.05840800  |
| O  | -1.18512800 | -0.36146300 | -3.02313600 |
| H  | -1.16303600 | 0.62260000  | -3.14160100 |

|   |              |             |             |
|---|--------------|-------------|-------------|
| H | -0.52012800  | -0.72147400 | -3.64312300 |
| O | -0.96266700  | -3.05990100 | -2.14354100 |
| H | -1.90320800  | -3.01157900 | -1.84245900 |
| H | -0.95824400  | -2.83211100 | -3.08873700 |
| O | 1.05430000   | 3.11715300  | 1.92355400  |
| H | 1.54691400   | 3.24863200  | 1.08113700  |
| H | 0.61473400   | 3.97560000  | 2.07232600  |
| H | 1.60607000   | 3.75314900  | 8.36448500  |
| H | 3.35158200   | 3.64578500  | 8.08205700  |
| H | -9.57879500  | 2.10908600  | 2.62127400  |
| H | -11.08879600 | 3.04645400  | 2.68063800  |
| H | 4.49439100   | 6.80083000  | -3.25206200 |
| H | 3.23446300   | 7.26102500  | -2.09264400 |
| H | 4.18632700   | -7.39821400 | -1.15867700 |
| H | 5.08772000   | -8.37476700 | 0.00724400  |
| H | 1.37100600   | -0.27773200 | -7.39475400 |
| H | 0.67619900   | 0.40501600  | -5.90574500 |
| H | 8.63112000   | -4.77772400 | 3.41859800  |
| H | 7.85651600   | -4.55395300 | 1.84042100  |
| H | -5.40188900  | 0.52466900  | -5.14422600 |
| H | -0.08605900  | 6.33667800  | -4.05752400 |
| H | -0.67652600  | 5.70084500  | -2.51327300 |
| H | -1.91883900  | 7.04412300  | -0.37819700 |
| H | -1.17580300  | 5.42745000  | -0.45275100 |
| H | -2.79839300  | -4.43444400 | 1.60477500  |
| H | -5.89658600  | 4.58190200  | 0.22379500  |
| H | -5.34110800  | 3.94665500  | -1.33566300 |
| H | 2.35609200   | -5.17142100 | -2.17688500 |
| H | 4.56505500   | 3.55554000  | -4.80988500 |
| H | -4.06628800  | -0.60410600 | -5.42922700 |

#### Kinase reaction Path C

##### Kinase-C-R

|   |             |             |             |
|---|-------------|-------------|-------------|
| C | -7.72887600 | -2.89062300 | -3.82767600 |
| H | -6.88982800 | -3.42846200 | -4.28648000 |
| C | -7.46787000 | -1.37959100 | -3.79266600 |
| H | -8.34746600 | -0.87313000 | -3.36955300 |
| H | -7.37366900 | -1.00697500 | -4.82312600 |
| C | -6.22248500 | -0.95893300 | -2.99333500 |
| H | -5.32830700 | -1.45061400 | -3.40248300 |
| H | -6.30492600 | -1.29185800 | -1.95067900 |
| C | -6.04556600 | 0.56904500  | -3.03692300 |
| H | -6.96490500 | 1.03851400  | -2.66240400 |



|   |             |             |             |
|---|-------------|-------------|-------------|
| H | -5.92753100 | 0.89386100  | -4.07666900 |
| N | -4.93774800 | 1.13014800  | -2.27233500 |
| H | -5.04927800 | 1.28790600  | -1.26689900 |
| C | -3.77284100 | 1.54072500  | -2.81499300 |
| N | -3.33585000 | 1.00332400  | -3.98233100 |
| H | -2.37116300 | 1.28446300  | -4.22934000 |
| H | -3.50235300 | 0.00910500  | -4.07172400 |
| N | -3.09230700 | 2.53737700  | -2.27058600 |
| H | -3.43716500 | 3.02593500  | -1.44203100 |
| H | -2.09807800 | 2.62343400  | -2.48625600 |
| C | -5.02838200 | -7.75496600 | -0.52561800 |
| H | -5.20682200 | -8.76086500 | -0.12788100 |
| C | -4.40359200 | -7.82077700 | -1.92339400 |
| H | -5.05282500 | -8.41576800 | -2.58003500 |
| H | -3.44741400 | -8.36143900 | -1.87116400 |
| C | -4.16471400 | -6.45130000 | -2.58047000 |
| H | -5.12440300 | -5.92646500 | -2.69448300 |
| H | -3.77989700 | -6.61509800 | -3.59757200 |
| C | -3.18607400 | -5.55507100 | -1.80818900 |
| H | -2.28452200 | -6.13857700 | -1.56176200 |
| H | -3.62968700 | -5.22377500 | -0.86279700 |
| C | -2.76077100 | -4.32754100 | -2.61297000 |
| H | -3.62361200 | -3.70184400 | -2.86171000 |
| H | -2.28449200 | -4.62850300 | -3.55254100 |
| N | -1.79448200 | -3.47365300 | -1.86858900 |
| H | -1.05032700 | -3.02184500 | -2.51018700 |
| H | -1.27289900 | -4.01046500 | -1.17271700 |
| H | -2.21651300 | -2.62862300 | -1.35519300 |
| C | -1.11484000 | 4.29062200  | -7.62974000 |
| H | -1.12453300 | 3.43791200  | -8.32094600 |
| C | -1.05143700 | 3.82256500  | -6.17500800 |
| H | -1.94046400 | 3.22881600  | -5.93216300 |
| H | -1.07210200 | 4.69487900  | -5.50763400 |
| C | 0.20477100  | 2.99100500  | -5.88106300 |
| H | 1.11087300  | 3.56024300  | -6.11150300 |
| H | 0.20657900  | 2.09545900  | -6.51882600 |
| C | 0.28038300  | 2.53087400  | -4.43243000 |
| O | -0.70767400 | 1.89684400  | -3.92867600 |
| O | 1.31073500  | 2.78098700  | -3.75344300 |
| C | -2.95880000 | 6.67103900  | 2.88211200  |
| H | -2.73927800 | 5.62112800  | 3.09468500  |
| C | -3.86713300 | 6.81682300  | 1.65578400  |
| H | -4.13941800 | 7.87295900  | 1.52497600  |
| H | -4.80443300 | 6.27024200  | 1.82351400  |

|   |             |             |             |
|---|-------------|-------------|-------------|
| C | -3.23066700 | 6.31178500  | 0.34501000  |
| H | -2.31674400 | 6.87301600  | 0.12457300  |
| H | -3.93792200 | 6.46200500  | -0.47783100 |
| C | -2.89818100 | 4.82061600  | 0.42725900  |
| O | -3.83713100 | 4.00979300  | 0.19008100  |
| O | -1.71090700 | 4.49719200  | 0.75942000  |
| C | 1.20115200  | 4.92152700  | 4.19688400  |
| H | 1.77525500  | 4.37322200  | 4.95018400  |
| C | -0.06822400 | 4.14608400  | 3.82235000  |
| H | -0.63331100 | 4.68406100  | 3.05666000  |
| H | -0.71924200 | 4.07626500  | 4.70600200  |
| C | 0.17141400  | 2.70648500  | 3.35389700  |
| O | 0.97343600  | 1.96632000  | 3.95709100  |
| N | -0.59084200 | 2.30964500  | 2.32289600  |
| H | -1.12078200 | 2.99309600  | 1.77970000  |
| H | -0.50070400 | 1.37286500  | 1.91969500  |
| C | 2.40754100  | 6.08210600  | 0.65515900  |
| H | 2.88982200  | 5.83038400  | -0.29506400 |
| C | 1.13100900  | 6.88307900  | 0.40986300  |
| H | 1.37054500  | 7.80356500  | -0.13817200 |
| H | 0.68413700  | 7.18939400  | 1.36877100  |
| O | 0.17396000  | 6.17801600  | -0.37522300 |
| H | -0.41703800 | 5.65632200  | 0.21551400  |
| C | 6.16108900  | 2.89829200  | 1.01662800  |
| H | 6.78224900  | 2.02791800  | 0.76967900  |
| C | 4.80426100  | 2.82897200  | 0.31021400  |
| H | 4.93882200  | 2.83912700  | -0.77709800 |
| H | 4.21596900  | 3.72278800  | 0.55132700  |
| C | 4.02359300  | 1.57889900  | 0.71088700  |
| H | 3.92840900  | 1.51083900  | 1.80279200  |
| H | 4.55719400  | 0.67118800  | 0.39414300  |
| C | 2.62583900  | 1.44441100  | 0.12575500  |
| O | 1.88843400  | 0.54826800  | 0.63480000  |
| O | 2.26468700  | 2.19372400  | -0.82032800 |
| C | 11.18236100 | 1.04460000  | -1.27965200 |
| H | 11.08536400 | 1.07361500  | -0.18818300 |
| C | 11.51953800 | -0.37561700 | -1.76207600 |
| H | 12.46601200 | -0.72202600 | -1.33647000 |
| H | 11.61029100 | -0.37723900 | -2.85567800 |
| C | 10.43246200 | -1.36447100 | -1.35883800 |
| O | 9.27845600  | -1.09691900 | -1.94989400 |
| O | 10.61927900 | -2.26655500 | -0.55218600 |
| C | 4.61583400  | -1.30894600 | 4.85848500  |
| H | 4.07906700  | -0.47494000 | 4.39432500  |

|   |             |             |             |
|---|-------------|-------------|-------------|
| C | 5.12842700  | -2.28535200 | 3.79770000  |
| H | 4.28070700  | -2.64086400 | 3.19713900  |
| H | 5.56715100  | -3.17179100 | 4.28078300  |
| C | 6.15621600  | -1.64857900 | 2.85537700  |
| H | 7.06235800  | -1.37743300 | 3.41927300  |
| H | 5.73805300  | -0.70756100 | 2.47197200  |
| C | 6.51288800  | -2.53607500 | 1.65828200  |
| H | 5.58478500  | -2.82344700 | 1.15563500  |
| H | 6.99388200  | -3.46617100 | 1.99945500  |
| C | 7.41092900  | -1.82844800 | 0.63482700  |
| H | 8.45691400  | -1.82340500 | 0.96144500  |
| H | 7.09260200  | -0.78505500 | 0.53159600  |
| N | 7.36517800  | -2.40583500 | -0.72441800 |
| H | 6.40695000  | -2.29287000 | -1.07711500 |
| H | 7.56644600  | -3.40481900 | -0.68335200 |
| H | 8.50739900  | -1.68404100 | -1.53373800 |
| C | -1.48734400 | -0.89391300 | 6.13661600  |
| H | -2.24187400 | -0.25442800 | 5.66602600  |
| C | -1.41569200 | -2.24263000 | 5.43436700  |
| H | -2.38741900 | -2.75452800 | 5.46363400  |
| H | -0.68303800 | -2.89432400 | 5.92142900  |
| O | -0.97631400 | -2.12548500 | 4.07405000  |
| H | -1.70951500 | -1.83103400 | 3.49716800  |
| C | -4.16514200 | 0.08115600  | 2.51559000  |
| C | -5.01916100 | 1.21656100  | 1.91596900  |
| H | -3.11222200 | 0.36682800  | 2.46156200  |
| H | -4.92613200 | 2.09560900  | 2.56725400  |
| H | -6.07216700 | 0.91802400  | 1.89941300  |
| O | -4.59199200 | 1.50798000  | 0.59971600  |
| H | -4.12430300 | 2.38386400  | 0.58337200  |
| O | -4.39318000 | -0.04382600 | 3.95908400  |
| C | -5.59369200 | -0.42453700 | 4.43966700  |
| O | -6.57737500 | -0.66055500 | 3.76947000  |
| C | -5.54901200 | -0.52041000 | 5.95100700  |
| H | -4.84274300 | -1.29966900 | 6.25687700  |
| H | -6.54457200 | -0.75891400 | 6.32748600  |
| C | -4.36301100 | -1.22385600 | 1.76781500  |
| O | -3.57087000 | -2.26181900 | 2.42312700  |
| H | -3.99168000 | -1.10291100 | 0.74649500  |
| H | -5.40571100 | -1.54194600 | 1.77148600  |
| C | -3.63985400 | -3.47921300 | 1.84301400  |
| C | -2.73900900 | -4.48522100 | 2.51963000  |
| O | -4.34278300 | -3.72564400 | 0.88312300  |
| H | -2.77424000 | -4.38428400 | 3.60741700  |

|    |             |             |             |
|----|-------------|-------------|-------------|
| H  | -1.70441300 | -4.31643000 | 2.20022900  |
| Mg | 0.66778300  | 1.74090800  | -2.03131800 |
| Mg | 1.07504700  | -1.13492800 | 1.21807900  |
| C  | 2.85063900  | -5.12207400 | -0.80235600 |
| H  | 3.41529600  | -6.05614100 | -0.87740900 |
| H  | 2.30018700  | -5.11425700 | 0.14762500  |
| O  | 3.79294200  | -4.06117700 | -0.86609400 |
| P  | 3.30898800  | -2.51258100 | -0.67202600 |
| O  | 4.48296300  | -1.63496300 | -0.92797500 |
| O  | 2.55287800  | -2.42912700 | 0.66472800  |
| O  | 2.17743800  | -2.46051100 | -1.87463400 |
| P  | 0.93314300  | -1.47659800 | -2.26333500 |
| O  | 1.40974600  | -0.08945100 | -2.59780400 |
| O  | 0.08009500  | -2.24758900 | -3.24785100 |
| O  | 0.14259100  | -1.46271000 | -0.80391300 |
| P  | -1.17286000 | -0.42488600 | -0.34255100 |
| O  | -2.44188200 | -1.16248100 | -0.76868000 |
| O  | -0.88162500 | -0.44489800 | 1.18175700  |
| O  | -0.91531100 | 0.91402800  | -1.01895500 |
| O  | 1.27560900  | -0.66215300 | 3.24524700  |
| H  | 1.27740100  | 0.32155800  | 3.41889200  |
| H  | 0.47395600  | -0.99452900 | 3.69752000  |
| O  | 0.38731700  | -3.15204500 | 1.91091100  |
| H  | 1.31429400  | -3.44603500 | 1.80977600  |
| H  | 0.16784700  | -3.07051500 | 2.85949500  |
| O  | -0.32923200 | 3.57296100  | -1.48948000 |
| H  | -0.79978400 | 3.54888400  | -0.63056700 |
| H  | 0.18465700  | 4.40361300  | -1.44989400 |
| H  | -0.24622400 | 4.91027400  | -7.88567700 |
| H  | -2.01626400 | 4.88557700  | -7.82231600 |
| H  | 10.23595600 | 1.38024100  | -1.71241900 |
| H  | 11.96775800 | 1.75413300  | -1.56642500 |
| H  | -3.43076300 | 7.10299200  | 3.77335800  |
| H  | -2.00130500 | 7.18391000  | 2.72889400  |
| H  | -4.38509000 | -7.22575500 | 0.18568600  |
| H  | -5.99037400 | -7.22805800 | -0.54729300 |
| H  | -1.75438200 | -1.02616600 | 7.19260900  |
| H  | -0.52211400 | -0.37922700 | 6.08540000  |
| H  | -8.62987500 | -3.12220000 | -4.40714200 |
| H  | -7.86656700 | -3.29309000 | -2.81685400 |
| H  | 5.44192300  | -0.89453900 | 5.45199200  |
| H  | 0.94217000  | 5.90648900  | 4.60120900  |
| H  | 1.84929800  | 5.06922900  | 3.32851400  |
| H  | 3.11733700  | 6.65420400  | 1.26652500  |

|   |             |             |             |
|---|-------------|-------------|-------------|
| H | 2.18651000  | 5.13991000  | 1.16631200  |
| H | 2.13761600  | -5.06208300 | -1.63300900 |
| H | 6.72144900  | 3.79657600  | 0.72810900  |
| H | 6.04113800  | 2.91688500  | 2.10785100  |
| H | -3.04944100 | -5.49045300 | 2.22880200  |
| H | -5.19974000 | 0.42306100  | 6.38205700  |
| H | 3.92053600  | -1.79708600 | 5.55297600  |

Kinase-C-TS

|   |            |             |            |
|---|------------|-------------|------------|
| C | 7.90008400 | -2.89276400 | 3.79859600 |
| H | 7.28893800 | -3.15158300 | 4.67215300 |
| C | 7.63959600 | -1.45019300 | 3.34243500 |
| H | 8.30733900 | -1.21647600 | 2.50092300 |
| H | 7.92909500 | -0.76455500 | 4.15281200 |
| C | 6.19137500 | -1.13297400 | 2.92035400 |
| H | 5.49911200 | -1.38132300 | 3.73779100 |
| H | 5.89082000 | -1.74668800 | 2.06220200 |
| C | 6.07840600 | 0.36121600  | 2.56051400 |
| H | 6.83888300 | 0.58883900  | 1.80249000 |
| H | 6.33291600 | 0.96023000  | 3.44339900 |
| N | 4.81404500 | 0.86814600  | 2.03845200 |
| H | 4.49891600 | 0.71138100  | 1.05141100 |
| C | 3.89083200 | 1.51398000  | 2.77039100 |
| N | 3.67878200 | 1.20712200  | 4.08289300 |
| H | 2.77528900 | 1.55757100  | 4.42162700 |
| H | 3.81869300 | 0.22676300  | 4.29620100 |
| N | 3.19157200 | 2.49683000  | 2.22038100 |
| H | 3.46333000 | 2.91542700  | 1.31736600 |
| H | 2.30785400 | 2.77867500  | 2.64479000 |
| C | 5.05973000 | -7.77329500 | 0.64089300 |
| H | 5.48466800 | -8.56064100 | 0.00642600 |
| C | 3.88624800 | -8.30834500 | 1.46772400 |
| H | 4.22892000 | -9.16455900 | 2.06544800 |
| H | 3.10918000 | -8.69977700 | 0.79480500 |
| C | 3.25724600 | -7.26856200 | 2.40787400 |
| H | 4.03358200 | -6.87354300 | 3.08038000 |
| H | 2.52194100 | -7.77126900 | 3.05325400 |
| C | 2.56856200 | -6.10364900 | 1.68444300 |
| H | 1.82453400 | -6.50854800 | 0.97986600 |
| H | 3.28806000 | -5.53659800 | 1.08075200 |
| C | 1.85887000 | -5.14645500 | 2.64749500 |
| H | 2.58088700 | -4.70607700 | 3.34544300 |
| H | 1.13153700 | -5.70045100 | 3.25619100 |
| N | 1.15621100 | -4.03647500 | 1.98848300 |

|   |             |             |             |
|---|-------------|-------------|-------------|
| H | 0.38947200  | -3.03963800 | 2.81158100  |
| H | 0.53882600  | -4.38323000 | 1.25323000  |
| H | 1.79997400  | -3.36964400 | 1.53254700  |
| C | 1.48296800  | 4.51193900  | 7.50827800  |
| H | 1.47922600  | 3.67040200  | 8.21288600  |
| C | 1.36217000  | 4.02445900  | 6.06627400  |
| H | 2.22247000  | 3.39290900  | 5.81670000  |
| H | 1.40036700  | 4.88199600  | 5.38100500  |
| C | 0.06661400  | 3.23909600  | 5.82421100  |
| H | -0.81049200 | 3.85585600  | 6.04320900  |
| H | 0.03484000  | 2.37062600  | 6.49770400  |
| C | -0.04898600 | 2.72197400  | 4.40106600  |
| O | 0.91863900  | 2.04943100  | 3.90378200  |
| O | -1.09114700 | 2.95779600  | 3.73134000  |
| C | 3.25160400  | 6.61143100  | -3.07608500 |
| H | 2.89552100  | 5.58801400  | -3.22706300 |
| C | 4.13177700  | 6.71252600  | -1.82591300 |
| H | 4.54779500  | 7.72732700  | -1.75691300 |
| H | 4.98639200  | 6.02948700  | -1.91495900 |
| C | 3.38937000  | 6.40072500  | -0.51298200 |
| H | 2.51548200  | 7.05398200  | -0.41008500 |
| H | 4.06315600  | 6.59952300  | 0.32804400  |
| C | 2.94813600  | 4.93358700  | -0.40273800 |
| O | 3.78895700  | 4.09316400  | -0.03725900 |
| O | 1.71379800  | 4.67624200  | -0.70064800 |
| C | -0.95927800 | 4.92058300  | -4.30268700 |
| H | -1.68911400 | 4.39128800  | -4.92364100 |
| C | 0.25928400  | 4.02506300  | -4.03331600 |
| H | 0.98208000  | 4.55423300  | -3.40653100 |
| H | 0.74793800  | 3.77730500  | -4.98337500 |
| C | -0.14275100 | 2.71275500  | -3.37118300 |
| O | -0.85071200 | 1.89044200  | -3.98677400 |
| N | 0.29771100  | 2.53459400  | -2.11802400 |
| H | 0.87698000  | 3.23466100  | -1.64912700 |
| H | -0.03498400 | 1.73679500  | -1.57981100 |
| C | -2.09916500 | 6.18726700  | -0.77529900 |
| H | -2.68972200 | 5.76471400  | 0.04437200  |
| C | -0.97041600 | 7.05756700  | -0.22501700 |
| H | -1.38370700 | 7.84180400  | 0.42158300  |
| H | -0.44990800 | 7.56705000  | -1.05255600 |
| O | -0.04242800 | 6.32559100  | 0.56347400  |
| H | 0.56367900  | 5.83670900  | -0.04589100 |
| C | -5.92235100 | 3.07609600  | -1.02030000 |
| H | -6.56586100 | 2.21124700  | -0.81559200 |

|   |              |             |             |
|---|--------------|-------------|-------------|
| C | -4.56017400  | 2.93403400  | -0.32458600 |
| H | -4.69504000  | 2.89042000  | 0.76176500  |
| H | -3.95689200  | 3.82890800  | -0.51960400 |
| C | -3.78709500  | 1.69280900  | -0.78165100 |
| H | -3.67317200  | 1.67691600  | -1.87345900 |
| H | -4.33467700  | 0.77771100  | -0.51346600 |
| C | -2.39795800  | 1.51752900  | -0.18218400 |
| O | -1.62631900  | 0.66891100  | -0.74047800 |
| O | -2.05743800  | 2.19644100  | 0.82083800  |
| C | -10.95367900 | 1.38207800  | 1.37517200  |
| H | -10.81702700 | 1.46047800  | 0.29041900  |
| C | -11.42109100 | -0.02895800 | 1.76782800  |
| H | -12.37571100 | -0.27471000 | 1.29349000  |
| H | -11.55142600 | -0.08070400 | 2.85616700  |
| C | -10.40119700 | -1.07815600 | 1.34533000  |
| O | -9.25024300  | -0.93055800 | 1.98534700  |
| O | -10.62657800 | -1.92101100 | 0.48698200  |
| C | -4.51091900  | -1.24976700 | -4.78102800 |
| H | -3.99009600  | -0.40943700 | -4.31014500 |
| C | -5.05130000  | -2.21845400 | -3.72703600 |
| H | -4.21840000  | -2.57465800 | -3.10604300 |
| H | -5.48309500  | -3.10532700 | -4.21529900 |
| C | -6.09599800  | -1.57288600 | -2.80957200 |
| H | -6.98558200  | -1.29346300 | -3.39493000 |
| H | -5.67905400  | -0.63534900 | -2.41631600 |
| C | -6.49199700  | -2.45612500 | -1.62145500 |
| H | -5.57884700  | -2.76806500 | -1.10511500 |
| H | -6.98462100  | -3.37544700 | -1.97466700 |
| C | -7.39551500  | -1.73251800 | -0.61267100 |
| H | -8.43905700  | -1.72825700 | -0.94571500 |
| H | -7.07423100  | -0.68929900 | -0.51980400 |
| N | -7.36099700  | -2.29003000 | 0.75526100  |
| H | -6.41333900  | -2.14960700 | 1.12233900  |
| H | -7.53836100  | -3.29388500 | 0.72826100  |
| H | -8.51210100  | -1.54392900 | 1.56147600  |
| C | 1.58399600   | -0.99324700 | -6.13771200 |
| H | 2.48674200   | -0.58427500 | -5.67070500 |
| C | 1.25378500   | -2.36864000 | -5.56930000 |
| H | 2.06922600   | -3.07978700 | -5.76126800 |
| H | 0.34712400   | -2.77206900 | -6.03114000 |
| O | 0.97753300   | -2.32776600 | -4.15918700 |
| H | 1.81303000   | -2.23473100 | -3.65497000 |
| C | 3.66486700   | -0.28040900 | -2.47603400 |
| C | 3.75969000   | 0.89832400  | -1.47301100 |

|    |             |             |             |
|----|-------------|-------------|-------------|
| H  | 2.60779800  | -0.41902800 | -2.68972900 |
| H  | 3.19103700  | 1.73009800  | -1.92009000 |
| H  | 4.80675700  | 1.23063300  | -1.40872100 |
| O  | 3.28962900  | 0.53702700  | -0.20900600 |
| H  | 2.00669600  | 1.20688700  | 0.65832700  |
| O  | 4.20923200  | 0.08974600  | -3.78997200 |
| C  | 5.52813500  | 0.30189800  | -3.96051200 |
| O  | 6.38567600  | 0.14423500  | -3.11608000 |
| C  | 5.80434700  | 0.76409300  | -5.37801200 |
| H  | 5.41970400  | 0.03559000  | -6.09944400 |
| H  | 6.87914500  | 0.89115300  | -5.51458700 |
| C  | 4.20480900  | -1.59724200 | -1.94858900 |
| O  | 3.48435300  | -2.68183000 | -2.63442500 |
| H  | 3.98537100  | -1.67049300 | -0.88328500 |
| H  | 5.27191200  | -1.72630300 | -2.12259900 |
| C  | 3.63116800  | -3.92094600 | -2.10955800 |
| C  | 2.68357500  | -4.90904500 | -2.75297700 |
| O  | 4.41225900  | -4.18964800 | -1.22213000 |
| H  | 2.66020800  | -4.78868800 | -3.83986700 |
| H  | 1.67038500  | -4.73112300 | -2.37459400 |
| Mg | -0.48151600 | 1.84085700  | 2.07089500  |
| Mg | -0.99549900 | -1.17412100 | -1.20530900 |
| C  | -3.01479800 | -4.87894500 | 0.92599700  |
| H  | -3.61309500 | -5.78306700 | 1.06823600  |
| H  | -2.51670700 | -4.92552700 | -0.05004300 |
| O  | -3.91029900 | -3.77508200 | 0.99706300  |
| P  | -3.37181200 | -2.26003000 | 0.73116200  |
| O  | -4.50295100 | -1.32103700 | 0.95473800  |
| O  | -2.59139400 | -2.25761400 | -0.58584200 |
| O  | -2.24852900 | -2.18865400 | 1.96256900  |
| P  | -0.90372800 | -1.34126500 | 2.24547400  |
| O  | -1.18156100 | 0.05315600  | 2.72373300  |
| O  | -0.11752100 | -2.21190200 | 3.27549800  |
| O  | -0.15615600 | -1.38615000 | 0.83489000  |
| P  | 1.47434400  | -0.73588100 | 0.27719300  |
| O  | 2.39584700  | -1.68838800 | 0.97545300  |
| O  | 1.03612500  | -0.81442300 | -1.18525600 |
| O  | 1.17466300  | 0.73252800  | 0.97216900  |
| O  | -1.14028700 | -0.70319500 | -3.23161500 |
| H  | -1.13567800 | 0.27821800  | -3.42058400 |
| H  | -0.33985800 | -1.05729300 | -3.66993800 |
| O  | -0.52086400 | -3.21520700 | -1.96328200 |
| H  | -1.45199400 | -3.48964600 | -2.02014500 |
| H  | -0.16895000 | -3.12663600 | -2.87353000 |



|   |              |             |             |
|---|--------------|-------------|-------------|
| O | 0.50566900   | 3.59128900  | 1.41704800  |
| H | 1.00317500   | 3.77866400  | 0.57563000  |
| H | -0.04814600  | 4.39140100  | 1.51723800  |
| H | 0.64679000   | 5.16928600  | 7.77765000  |
| H | 2.41145500   | 5.07401500  | 7.66597200  |
| H | -9.99897300  | 1.61512500  | 1.85438800  |
| H | -11.68888600 | 2.13759500  | 1.67675000  |
| H | 3.80465600   | 6.90952400  | -3.97554100 |
| H | 2.37069700   | 7.26010900  | -2.99274300 |
| H | 4.76746600   | -6.94257900 | -0.01078300 |
| H | 5.86255500   | -7.40687100 | 1.29347200  |
| H | 1.75113600   | -1.06122500 | -7.21981000 |
| H | 0.76141200   | -0.29215200 | -5.95794600 |
| H | 8.95209400   | -3.03235000 | 4.07279400  |
| H | 7.66167100   | -3.61000400 | 3.00410700  |
| H | -5.32122200  | -0.84333300 | -5.40097200 |
| H | -0.65621500  | 5.83453300  | -4.82611800 |
| H | -1.45410600  | 5.21228100  | -3.37375300 |
| H | -2.76798400  | 6.76539600  | -1.42600300 |
| H | -1.69125100  | 5.34918800  | -1.34829300 |
| H | -2.25847000  | -4.81852700 | 1.71756900  |
| H | -6.45119500  | 3.97293700  | -0.67581600 |
| H | -5.80803600  | 3.15233400  | -2.10943700 |
| H | 2.99280800   | -5.92306700 | -2.49533800 |
| H | 5.29183000   | 1.71319100  | -5.56732900 |
| H | -3.79452200  | -1.74141600 | -5.45062000 |

Kinase-C-P

|   |             |             |            |
|---|-------------|-------------|------------|
| C | -7.82031800 | 4.32811500  | 2.40541500 |
| H | -6.94181400 | 4.47377800  | 3.04503500 |
| C | -8.18499800 | 2.84119200  | 2.29821800 |
| H | -9.09732200 | 2.72928600  | 1.69502500 |
| H | -8.43800000 | 2.46237400  | 3.29986000 |
| C | -7.07004800 | 1.96836700  | 1.69830500 |
| H | -6.12757500 | 2.16049700  | 2.22934000 |
| H | -6.87697700 | 2.24973500  | 0.65588600 |
| C | -7.42474000 | 0.46906300  | 1.76644700 |
| H | -8.29102400 | 0.26946300  | 1.12693500 |
| H | -7.72275500 | 0.20020100  | 2.78772400 |
| N | -6.37468800 | -0.45550000 | 1.34628500 |
| H | -6.30619800 | -0.68238200 | 0.35335300 |
| C | -5.35385600 | -0.82882500 | 2.13355100 |
| N | -5.22390500 | -0.30442900 | 3.37865800 |
| H | -4.29212000 | -0.46724700 | 3.79916500 |

|   |             |             |             |
|---|-------------|-------------|-------------|
| H | -5.57165900 | 0.63581600  | 3.50183200  |
| N | -4.50081100 | -1.78056900 | 1.76002000  |
| H | -4.55901700 | -2.30311300 | 0.87789700  |
| H | -3.62787600 | -1.83455500 | 2.28288200  |
| C | -4.12329700 | 8.42056100  | -0.97718700 |
| H | -4.34409600 | 9.12292500  | -1.78970800 |
| C | -2.86763600 | 8.84633200  | -0.20642800 |
| H | -3.01706900 | 9.86749900  | 0.17202600  |
| H | -2.01563100 | 8.90280900  | -0.89928300 |
| C | -2.48586000 | 7.93901700  | 0.97747800  |
| H | -3.34801300 | 7.84262900  | 1.65464600  |
| H | -1.70360400 | 8.44982200  | 1.55802500  |
| C | -1.96818400 | 6.54000700  | 0.60207200  |
| H | -1.19647500 | 6.63970200  | -0.17714200 |
| H | -2.76871500 | 5.92531800  | 0.17021400  |
| C | -1.34973200 | 5.80596300  | 1.80675900  |
| H | -2.11344100 | 5.64802600  | 2.57900000  |
| H | -0.58807300 | 6.45799200  | 2.25785000  |
| N | -0.72521200 | 4.50897900  | 1.52838600  |
| H | 0.45679500  | 3.81797400  | 2.55225600  |
| H | -0.11031200 | 4.55824100  | 0.71596000  |
| H | -1.40259600 | 3.77260600  | 1.29495600  |
| C | -2.73902000 | -3.27449300 | 7.51937200  |
| H | -3.54737900 | -2.64445700 | 7.91185900  |
| C | -2.41817400 | -2.92329000 | 6.05921500  |
| H | -3.30093700 | -3.10595900 | 5.43199800  |
| H | -1.62725000 | -3.58563800 | 5.68584800  |
| C | -1.96480100 | -1.46059700 | 5.87996700  |
| H | -1.07524900 | -1.27543900 | 6.49073000  |
| H | -2.76074100 | -0.78495300 | 6.21724100  |
| C | -1.61745500 | -1.13522400 | 4.42665000  |
| O | -2.56920400 | -0.76046200 | 3.65189800  |
| O | -0.42628500 | -1.27302100 | 4.06522500  |
| C | -3.87104100 | -6.42122200 | -2.89131800 |
| H | -3.55181000 | -5.39266800 | -3.09619400 |
| C | -4.61626800 | -6.51137700 | -1.55320600 |
| H | -4.96819200 | -7.54223600 | -1.40848700 |
| H | -5.51017300 | -5.87730800 | -1.58031500 |
| C | -3.76715500 | -6.10740100 | -0.33876800 |
| H | -2.83428200 | -6.68231300 | -0.31955500 |
| H | -4.31670900 | -6.36309000 | 0.57841800  |
| C | -3.43517000 | -4.60435500 | -0.23358500 |
| O | -4.37006100 | -3.78018200 | -0.39899700 |
| O | -2.22674500 | -4.30937500 | 0.06033600  |

|   |             |             |             |
|---|-------------|-------------|-------------|
| C | 0.60967400  | -5.39919700 | -3.87810900 |
| H | 1.30406500  | -4.89777900 | -4.55800300 |
| C | -0.36109000 | -4.38145000 | -3.27796200 |
| H | -1.04948100 | -4.85612900 | -2.57137600 |
| H | -0.97339300 | -3.94521600 | -4.07924200 |
| C | 0.37772000  | -3.23143300 | -2.60362300 |
| O | 1.31940100  | -2.66311700 | -3.18842900 |
| N | -0.05948900 | -2.88984800 | -1.38553300 |
| H | -0.83404000 | -3.37971200 | -0.94011900 |
| H | 0.38917600  | -2.13570900 | -0.86525700 |
| C | 1.27865700  | -6.35332700 | -0.13800500 |
| H | 1.83415700  | -5.41047700 | -0.14017400 |
| C | 0.59465200  | -6.57412200 | 1.21089900  |
| H | 1.34590800  | -6.64612300 | 2.00475400  |
| H | 0.04583800  | -7.53085400 | 1.19855100  |
| O | -0.27125500 | -5.51670000 | 1.59713800  |
| H | -0.98132700 | -5.37496000 | 0.92820200  |
| C | 5.47633600  | -3.76658300 | -0.34847400 |
| H | 6.24131400  | -2.99249700 | -0.48530700 |
| C | 4.33814900  | -3.27039200 | 0.55268700  |
| H | 4.72243300  | -3.03847100 | 1.55182500  |
| H | 3.60636400  | -4.07659100 | 0.69352600  |
| C | 3.62351800  | -2.03044500 | -0.00359000 |
| H | 3.30947000  | -2.18362800 | -1.04410200 |
| H | 4.30089500  | -1.16395500 | -0.00817000 |
| C | 2.40142500  | -1.62203200 | 0.79468600  |
| O | 1.51576300  | -0.83728800 | 0.25134300  |
| O | 2.21071500  | -2.04053200 | 1.95945500  |
| C | 10.46533200 | -2.39804900 | 2.32722600  |
| H | 10.22359900 | -2.76053000 | 1.32135500  |
| C | 11.40888200 | -1.18618200 | 2.26021900  |
| H | 12.34949800 | -1.44358800 | 1.76420000  |
| H | 11.63693800 | -0.84486600 | 3.27812200  |
| C | 10.76706800 | -0.03796600 | 1.49018200  |
| O | 9.67986600  | 0.40896900  | 2.09766900  |
| O | 11.20413300 | 0.37402800  | 0.42344900  |
| C | 4.95099300  | 0.20626400  | -4.68306400 |
| H | 4.19428900  | -0.24545300 | -4.03247500 |
| C | 5.77212900  | 1.25107700  | -3.92199400 |
| H | 5.09328700  | 2.00551300  | -3.50084500 |
| H | 6.43885400  | 1.78524900  | -4.61576500 |
| C | 6.59392300  | 0.63843900  | -2.78378100 |
| H | 7.35269400  | -0.04006900 | -3.20453100 |
| H | 5.92975600  | 0.02028300  | -2.16494100 |

|    |             |             |             |
|----|-------------|-------------|-------------|
| C  | 7.25750000  | 1.67268100  | -1.86790100 |
| H  | 6.47379100  | 2.29755300  | -1.42583700 |
| H  | 7.90787000  | 2.34247100  | -2.45260900 |
| C  | 8.06059000  | 1.01543100  | -0.73378600 |
| H  | 9.07724200  | 0.76428000  | -1.05496000 |
| H  | 7.56796400  | 0.08430600  | -0.43702000 |
| N  | 8.15759900  | 1.82126000  | 0.50135000  |
| H  | 7.20635900  | 1.88312200  | 0.88566300  |
| H  | 8.47183300  | 2.76679400  | 0.28377000  |
| H  | 9.12878000  | 1.05846400  | 1.47407700  |
| C  | -0.99149400 | 0.50584000  | -6.59397200 |
| H  | -1.98948000 | 0.19124600  | -6.26575800 |
| C  | -0.47406900 | 1.67035900  | -5.75127500 |
| H  | -1.14758800 | 2.53457100  | -5.83261100 |
| H  | 0.50882800  | 1.98616300  | -6.11491500 |
| O  | -0.27982000 | 1.33978000  | -4.36888400 |
| H  | -1.13333400 | 1.35654800  | -3.89243800 |
| C  | -3.71632700 | -0.49269500 | -2.95220400 |
| C  | -2.95430300 | -0.89912300 | -1.66787100 |
| H  | -3.06265300 | -0.66911900 | -3.81173100 |
| H  | -1.89257100 | -0.96147800 | -1.90605000 |
| H  | -3.29935200 | -1.88803600 | -1.35062900 |
| O  | -3.14838700 | 0.01861500  | -0.59416000 |
| H  | -1.99996700 | -0.11767100 | 2.10222400  |
| O  | -4.80908200 | -1.42464200 | -3.24447800 |
| C  | -5.82556500 | -1.55677300 | -2.38047200 |
| O  | -6.05701300 | -0.76828900 | -1.47888000 |
| C  | -6.61357800 | -2.81356100 | -2.63078500 |
| H  | -6.54416200 | -3.13575500 | -3.67173800 |
| H  | -7.65527800 | -2.66529500 | -2.33795200 |
| C  | -4.20564800 | 0.95329400  | -3.00471100 |
| O  | -3.03220500 | 1.79390200  | -3.09064800 |
| H  | -4.76570200 | 1.21621100  | -2.11224200 |
| H  | -4.83338700 | 1.10710300  | -3.88919100 |
| C  | -3.24823800 | 3.11224500  | -2.76740500 |
| C  | -1.95806400 | 3.84402300  | -2.53198600 |
| O  | -4.36069900 | 3.57347200  | -2.66142400 |
| H  | -1.16921900 | 3.53417100  | -3.21936100 |
| H  | -1.62447400 | 3.59011500  | -1.51900700 |
| Mg | 0.40584000  | -0.94470800 | 2.21128500  |
| Mg | 1.28035700  | 0.97613200  | -0.83416800 |
| C  | 3.67849800  | 4.58228000  | 0.31185700  |
| H  | 4.23808500  | 5.50255900  | 0.11911100  |
| H  | 2.94426500  | 4.43320500  | -0.48941100 |

|   |             |             |             |
|---|-------------|-------------|-------------|
| O | 4.63118800  | 3.52202000  | 0.35221600  |
| P | 4.12563500  | 1.97756100  | 0.54605900  |
| O | 5.32802600  | 1.14681200  | 0.84516600  |
| O | 3.24617200  | 1.60336300  | -0.65531200 |
| O | 3.18727000  | 2.10999300  | 1.89473700  |
| P | 1.55921400  | 2.03311900  | 2.09708300  |
| O | 1.24052200  | 0.76175200  | 2.86415600  |
| O | 1.26044000  | 3.33884200  | 2.96520000  |
| O | 0.89015900  | 2.17771100  | 0.73609000  |
| P | -1.85805400 | 0.85125600  | 0.02523300  |
| O | -2.39599900 | 2.16499300  | 0.49937000  |
| O | -0.73941900 | 0.71434800  | -0.99728100 |
| O | -1.40141300 | -0.10800600 | 1.30320100  |
| O | 1.58285200  | -0.01874600 | -2.70211900 |
| H | 1.63007500  | -1.00876500 | -2.75919200 |
| H | 0.90980700  | 0.23323200  | -3.36464400 |
| O | 1.39521200  | 2.72565900  | -2.22470600 |
| H | 2.35932700  | 2.63846900  | -2.06508900 |
| H | 1.21493300  | 2.37471900  | -3.11369400 |
| O | -0.50118600 | -2.77678100 | 1.62062300  |
| H | -1.32844100 | -2.99161200 | 1.14463700  |
| H | -0.09113700 | -3.65260800 | 1.78833900  |
| H | -1.86208300 | -3.12712400 | 8.16140600  |
| H | -3.05276700 | -4.32068800 | 7.61519200  |
| H | 9.52930000  | -2.12521400 | 2.82174100  |
| H | 10.92530200 | -3.22543900 | 2.88101000  |
| H | -4.50747800 | -6.74456800 | -3.72392100 |
| H | -2.97531800 | -7.05492700 | -2.89002500 |
| H | -4.01269200 | 7.42442400  | -1.42075600 |
| H | -4.99873100 | 8.38969500  | -0.31596400 |
| H | -1.05939400 | 0.80232600  | -7.64755700 |
| H | -0.31771100 | -0.35366600 | -6.51642200 |
| H | -8.64712300 | 4.90673200  | 2.83270000  |
| H | -7.58541100 | 4.75165100  | 1.42196700  |
| H | 5.59053900  | -0.59811000 | -5.07002600 |
| H | 0.06955000  | -6.17355600 | -4.43462800 |
| H | 1.20203400  | -5.89131200 | -3.10019500 |
| H | 1.97639300  | -7.17144100 | -0.35641000 |
| H | 0.53845500  | -6.31567300 | -0.94508000 |
| H | 3.15166700  | 4.66887000  | 1.26857100  |
| H | 5.96634400  | -4.64681300 | 0.08480400  |
| H | 5.10534700  | -4.04378400 | -1.34348400 |
| H | -2.13300000 | 4.91877000  | -2.60339000 |
| H | -6.16502800 | -3.58105900 | -1.98638200 |

|   |            |            |             |
|---|------------|------------|-------------|
| H | 4.42760200 | 0.65125600 | -5.53966600 |
|---|------------|------------|-------------|

#### ATPase reaction Path

##### ATPase-R

|   |             |             |             |
|---|-------------|-------------|-------------|
| C | -8.25396100 | 4.91986600  | -0.55032400 |
| H | -8.71417900 | 4.82246700  | 0.44096000  |
| C | -7.67652400 | 3.58118900  | -1.02747800 |
| H | -7.25326500 | 3.69761000  | -2.03432800 |
| H | -8.48849700 | 2.84614600  | -1.12334000 |
| C | -6.59944200 | 3.03069600  | -0.08558200 |
| H | -7.01383100 | 2.95923300  | 0.93301900  |
| H | -5.76550000 | 3.74282100  | -0.01566400 |
| C | -6.04501100 | 1.66184600  | -0.51216900 |
| H | -5.56332700 | 1.70882300  | -1.49441700 |
| H | -6.84917400 | 0.92105800  | -0.58568000 |
| N | -5.02865700 | 1.15988900  | 0.40857200  |
| H | -4.04703700 | 1.41442500  | 0.21439400  |
| C | -5.23197500 | 0.26414800  | 1.37749100  |
| N | -6.49953100 | 0.04590600  | 1.84270600  |
| H | -6.60998000 | -0.64842800 | 2.56727600  |
| H | -7.14117700 | 0.82405400  | 1.87145400  |
| N | -4.22624800 | -0.44777300 | 1.84868600  |
| H | -3.31702300 | -0.41570800 | 1.36115700  |
| H | -4.16386300 | -0.86169800 | 2.78057200  |
| C | -4.72712600 | 7.79518300  | -0.39362900 |
| H | -5.44477100 | 8.32133000  | -1.03323800 |
| C | -3.29081900 | 8.23882600  | -0.69896100 |
| H | -3.22216400 | 9.32641700  | -0.56435300 |
| H | -3.06128100 | 8.04886200  | -1.75691700 |
| C | -2.22001300 | 7.57264200  | 0.18222800  |
| H | -2.51191000 | 7.67556300  | 1.23804500  |
| H | -1.27524800 | 8.12338700  | 0.07367900  |
| C | -1.95653100 | 6.09071800  | -0.13108100 |
| H | -1.56613100 | 5.99490600  | -1.15398300 |
| H | -2.88873400 | 5.51280100  | -0.09711000 |
| C | -0.96285500 | 5.48663600  | 0.86056300  |
| H | -1.37727500 | 5.49413200  | 1.87338600  |
| H | -0.03209800 | 6.06374900  | 0.88531800  |
| N | -0.60960200 | 4.07508400  | 0.56105300  |
| H | -0.10539500 | 3.62843500  | 1.38993900  |
| H | -0.01634000 | 3.95512500  | -0.27390700 |
| H | -1.43893500 | 3.43508000  | 0.40361300  |
| C | -3.23961800 | -2.36539400 | 8.16388300  |

|   |             |             |             |
|---|-------------|-------------|-------------|
| H | -2.53578300 | -3.10454100 | 8.56623300  |
| C | -2.72612300 | -1.77345700 | 6.84384400  |
| H | -1.77513600 | -1.25455800 | 7.02207300  |
| H | -3.42303900 | -1.01447000 | 6.46868300  |
| C | -2.51985700 | -2.83546000 | 5.75143700  |
| H | -3.48211500 | -3.32247000 | 5.53564300  |
| H | -1.82720800 | -3.61037200 | 6.09507100  |
| C | -1.98409600 | -2.25328600 | 4.44372600  |
| O | -2.63838200 | -1.34472700 | 3.84822600  |
| O | -0.88813000 | -2.69813700 | 3.98605100  |
| C | -7.26299900 | -4.35086700 | -2.80389100 |
| H | -6.59606800 | -3.80819900 | -3.48231900 |
| C | -7.08198000 | -3.84735600 | -1.36618100 |
| H | -7.78941000 | -4.37204800 | -0.70773700 |
| H | -7.32894800 | -2.78053500 | -1.32335400 |
| C | -5.66091400 | -4.03331300 | -0.82080500 |
| H | -5.31342600 | -5.06410400 | -0.96442700 |
| H | -5.65305700 | -3.87488200 | 0.26766300  |
| C | -4.59966600 | -3.07230800 | -1.39506000 |
| O | -4.97224900 | -2.02534700 | -1.95703600 |
| O | -3.37525500 | -3.43006200 | -1.20173900 |
| C | -0.24213600 | -4.62267900 | -4.54690600 |
| H | 0.64105900  | -4.22114500 | -5.05192400 |
| C | -1.26514000 | -3.51042500 | -4.31082900 |
| H | -2.14581800 | -3.88637200 | -3.78071100 |
| H | -1.60087700 | -3.10280700 | -5.27273600 |
| C | -0.61991900 | -2.37754300 | -3.53049300 |
| O | 0.39796200  | -1.81450600 | -3.99717800 |
| N | -1.17680400 | -2.07920700 | -2.35881600 |
| H | -2.02870600 | -2.54736300 | -2.01340500 |
| H | -0.81786400 | -1.29480800 | -1.82021200 |
| C | -0.31226400 | -5.59891100 | -0.36276100 |
| H | 0.04879900  | -5.15165900 | 0.56939000  |
| C | -1.62162400 | -6.35328700 | -0.13687500 |
| H | -1.46822000 | -7.16350700 | 0.58656200  |
| H | -1.95408500 | -6.82188900 | -1.07773100 |
| O | -2.65583400 | -5.53630600 | 0.39846600  |
| H | -2.95128400 | -4.89170100 | -0.29690100 |
| C | 4.56946300  | -4.57598600 | 1.54560800  |
| H | 5.36119700  | -3.86099100 | 1.80267300  |
| C | 3.18541200  | -3.90387400 | 1.56456200  |
| H | 2.96567000  | -3.53101900 | 2.57105600  |
| H | 2.41177400  | -4.65075800 | 1.34565600  |
| C | 3.07609300  | -2.74494800 | 0.56876300  |

|    |             |             |             |
|----|-------------|-------------|-------------|
| H  | 3.27548100  | -3.08638900 | -0.45635500 |
| H  | 3.83615200  | -1.98104700 | 0.78506300  |
| C  | 1.74691900  | -1.98817900 | 0.54350800  |
| O  | 1.62165700  | -1.12184500 | -0.38369100 |
| O  | 0.87733400  | -2.23961200 | 1.41374600  |
| C  | 12.32142900 | 0.42578700  | 1.61130800  |
| H  | 12.36393500 | -0.45034300 | 0.95384100  |
| C  | 11.42501400 | 1.51095500  | 1.01946300  |
| H  | 11.78669800 | 1.84733600  | 0.04028400  |
| H  | 11.43253700 | 2.40315800  | 1.66315800  |
| C  | 9.95538000  | 1.07961800  | 0.86104300  |
| O  | 9.57025200  | 0.08844500  | 1.55021100  |
| O  | 9.25177300  | 1.77105700  | 0.06304700  |
| C  | 4.95181800  | -1.65179800 | -5.20185800 |
| H  | 4.31858800  | -2.46363500 | -4.82403600 |
| C  | 5.22428500  | -0.61618000 | -4.10842200 |
| H  | 4.27249300  | -0.18640500 | -3.77189500 |
| H  | 5.81645600  | 0.21268400  | -4.52388900 |
| C  | 5.96534500  | -1.20743200 | -2.90347800 |
| H  | 6.92689900  | -1.62890100 | -3.23593500 |
| H  | 5.38245000  | -2.04863000 | -2.50084800 |
| C  | 6.20862600  | -0.18475500 | -1.78845800 |
| H  | 5.24796600  | 0.19501700  | -1.41985100 |
| H  | 6.76641200  | 0.67508800  | -2.18636700 |
| C  | 6.98982500  | -0.77668200 | -0.61792400 |
| H  | 7.99465300  | -1.08505300 | -0.92435300 |
| H  | 6.47345600  | -1.65022600 | -0.20717000 |
| N  | 7.15605100  | 0.20966600  | 0.47820300  |
| H  | 6.23585000  | 0.44023100  | 0.90219500  |
| H  | 7.70616200  | 1.05521400  | 0.14526500  |
| H  | 7.87930300  | -0.11143200 | 1.17485500  |
| C  | -0.04693500 | 0.87789400  | -6.32493700 |
| H  | 0.25824500  | -0.11407900 | -5.97628900 |
| C  | -0.93541300 | 1.55736200  | -5.27917500 |
| H  | -1.82018400 | 0.95106400  | -5.05758600 |
| H  | -1.28269900 | 2.53211400  | -5.64623400 |
| O  | -0.21833300 | 1.78592700  | -4.03992100 |
| H  | -0.71235900 | 1.39004800  | -3.28774600 |
| O  | -3.65192300 | 0.38186200  | -2.71664100 |
| H  | -4.03955100 | -0.50167300 | -2.51440300 |
| Mg | -0.86336100 | -1.57008700 | 2.24709200  |
| Mg | 1.32987600  | 0.70934300  | -1.05815000 |
| C  | 3.33183500  | 4.05537900  | 1.68661800  |
| H  | 4.02283000  | 4.82188100  | 2.04760100  |



|   |             |             |             |
|---|-------------|-------------|-------------|
| H | 3.06319300  | 4.27715900  | 0.64594900  |
| O | 4.02701400  | 2.81239300  | 1.77739600  |
| P | 3.45571800  | 1.44038400  | 1.13632300  |
| O | 4.51595700  | 0.40119800  | 1.28559500  |
| O | 2.86177100  | 1.75259300  | -0.24586000 |
| O | 2.20265500  | 0.99565000  | 2.11471400  |
| P | 0.62565500  | 1.35472300  | 2.26739400  |
| O | -0.05413500 | 0.22585200  | 2.98854200  |
| O | 0.44473700  | 2.79612100  | 2.69056200  |
| O | 0.15568500  | 1.30996000  | 0.66089400  |
| P | -1.32036300 | 0.84275900  | -0.02237500 |
| O | -2.30326700 | 1.99907900  | 0.16514200  |
| O | -0.77811300 | 0.65448200  | -1.46642100 |
| O | -1.73838300 | -0.45725400 | 0.66565900  |
| O | 1.78179400  | 0.24085600  | -3.01045300 |
| H | 1.40524800  | -0.66228600 | -3.23069300 |
| H | 1.24757800  | 0.81192000  | -3.60732200 |
| O | 1.04217200  | 2.94582700  | -1.80493100 |
| H | 2.00683200  | 3.07189700  | -1.76964700 |
| H | 0.75742600  | 2.90051400  | -2.74167300 |
| O | -2.16382400 | -2.99104400 | 1.35983700  |
| H | -2.51313900 | -2.79928600 | 0.46537000  |
| H | -2.13416800 | -3.97094300 | 1.38229100  |
| H | -4.20406500 | -2.87159500 | 8.02506100  |
| H | -3.37710500 | -1.58714900 | 8.92460500  |
| H | 11.92282900 | 0.08573100  | 2.57074500  |
| H | 13.34797900 | 0.78734500  | 1.76070200  |
| H | -8.29290500 | -4.20454200 | -3.15278100 |
| H | -7.03157100 | -5.42131500 | -2.88218000 |
| H | -4.86743100 | 6.72057000  | -0.55911800 |
| H | -4.99071200 | 8.00789100  | 0.64980900  |
| H | -0.60113100 | 0.76925500  | -7.26484400 |
| H | 0.84881700  | 1.47786200  | -6.52317500 |
| H | -9.02115000 | 5.29251800  | -1.23873300 |
| H | -7.47159900 | 5.68535500  | -0.47710600 |
| H | 5.88396900  | -2.09996300 | -5.57105100 |
| H | -0.66459200 | -5.42415200 | -5.16429800 |
| H | 0.08263800  | -5.06484100 | -3.59842800 |
| H | 0.46333100  | -6.27523900 | -0.74573600 |
| H | -0.44670000 | -4.78684000 | -1.08588100 |
| H | 2.43226300  | 4.03857200  | 2.30923700  |
| H | 4.61932900  | -5.40082700 | 2.26652000  |
| H | 4.80253000  | -4.98526800 | 0.55370900  |
| H | 4.43432300  | -1.20415400 | -6.05875100 |

|           |             |             |             |
|-----------|-------------|-------------|-------------|
| H         | -2.74839000 | 0.32394000  | -2.36561600 |
| ATPase-TS |             |             |             |
| C         | -8.61900300 | 3.83667700  | 1.33617900  |
| H         | -8.56329000 | 3.85607300  | 2.43150300  |
| C         | -8.32307400 | 2.43852500  | 0.79005000  |
| H         | -8.42152000 | 2.44374500  | -0.30466900 |
| H         | -9.07973400 | 1.73130600  | 1.15964800  |
| C         | -6.92612200 | 1.93314200  | 1.16616300  |
| H         | -6.81587300 | 1.92834800  | 2.26108700  |
| H         | -6.16134700 | 2.62474600  | 0.78909900  |
| C         | -6.64522200 | 0.53279600  | 0.60466900  |
| H         | -6.77390400 | 0.55038000  | -0.48434200 |
| H         | -7.36714600 | -0.19240500 | 0.99712100  |
| N         | -5.30203700 | 0.03872900  | 0.87058800  |
| H         | -4.51988100 | 0.38364000  | 0.27467400  |
| C         | -4.96921200 | -0.78250100 | 1.87213500  |
| N         | -5.84466800 | -0.97466000 | 2.91197600  |
| H         | -5.50561900 | -1.58159000 | 3.64784800  |
| H         | -6.34103800 | -0.15871600 | 3.24379900  |
| N         | -3.84871200 | -1.47806700 | 1.84118300  |
| H         | -3.21547700 | -1.36705100 | 1.03759900  |
| H         | -3.30642400 | -1.65051500 | 2.70434100  |
| C         | -5.14837300 | 7.97926900  | -2.22077900 |
| H         | -5.18640400 | 8.88480600  | -2.83775900 |
| C         | -4.67413000 | 8.29736400  | -0.80031600 |
| H         | -5.31826100 | 9.07680500  | -0.37032700 |
| H         | -3.66294600 | 8.72659000  | -0.84254400 |
| C         | -4.66217900 | 7.08630300  | 0.14423500  |
| H         | -5.68685100 | 6.69907500  | 0.25469400  |
| H         | -4.35752300 | 7.42727100  | 1.14425300  |
| C         | -3.73043000 | 5.94645500  | -0.29440500 |
| H         | -2.75554600 | 6.36704100  | -0.58547100 |
| H         | -4.12555900 | 5.43986300  | -1.18453000 |
| C         | -3.49657700 | 4.91763500  | 0.81878700  |
| H         | -4.44850200 | 4.46397000  | 1.12414400  |
| H         | -3.11205700 | 5.44343600  | 1.70435500  |
| N         | -2.56723700 | 3.83361200  | 0.49193300  |
| H         | -1.79227900 | 3.06835900  | 1.72038900  |
| H         | -1.77968300 | 4.16341900  | -0.06508000 |
| H         | -2.97891300 | 3.05711000  | -0.03521600 |
| C         | -3.12969500 | -2.66683100 | 7.44703900  |
| H         | -2.72430800 | -1.87530800 | 8.08990800  |
| C         | -2.81626800 | -2.39458400 | 5.97369800  |

|   |             |             |             |
|---|-------------|-------------|-------------|
| H | -3.28013200 | -1.45229400 | 5.65780800  |
| H | -3.26031700 | -3.18557100 | 5.35210700  |
| C | -1.31441400 | -2.31302200 | 5.68381300  |
| H | -0.80626200 | -3.24786700 | 5.94614500  |
| H | -0.85827600 | -1.53030000 | 6.30758900  |
| C | -0.97553500 | -1.97581500 | 4.23458500  |
| O | -1.82118300 | -1.32310800 | 3.53589400  |
| O | 0.14010500  | -2.31688600 | 3.76398700  |
| C | -3.24413100 | -6.85967800 | -2.65106000 |
| H | -2.72895500 | -5.97391500 | -3.03485200 |
| C | -4.39641600 | -6.47709200 | -1.71827600 |
| H | -4.91847900 | -7.38474500 | -1.38536700 |
| H | -5.13081100 | -5.87187300 | -2.26545000 |
| C | -3.93192400 | -5.68450200 | -0.48180200 |
| H | -3.23149000 | -6.28201400 | 0.11088700  |
| H | -4.79856400 | -5.43798900 | 0.14129100  |
| C | -3.25642900 | -4.38205900 | -0.91390800 |
| O | -4.00794800 | -3.42086500 | -1.21146000 |
| O | -1.97768800 | -4.37474600 | -0.98989500 |
| C | 1.16273000  | -5.45130600 | -3.48238200 |
| H | 2.24105500  | -5.27621500 | -3.40244100 |
| C | 0.46096300  | -4.24811600 | -4.13694100 |
| H | -0.62276500 | -4.41883800 | -4.14981500 |
| H | 0.80034100  | -4.12981600 | -5.17015800 |
| C | 0.76877800  | -2.93536100 | -3.41850900 |
| O | 1.65374300  | -2.17561500 | -3.85751600 |
| N | 0.06526700  | -2.69446100 | -2.30315200 |
| H | -0.70223200 | -3.28691700 | -1.98164200 |
| H | 0.25670700  | -1.84672000 | -1.77248600 |
| C | 1.67876700  | -5.97987700 | 0.36477500  |
| H | 1.91741000  | -5.50336100 | 1.32133400  |
| C | 0.39004600  | -6.79110400 | 0.47884200  |
| H | 0.50267200  | -7.56362400 | 1.25014100  |
| H | 0.18312100  | -7.31417400 | -0.46885200 |
| O | -0.73092200 | -6.00178300 | 0.86053300  |
| H | -1.09966900 | -5.54715600 | 0.06440100  |
| C | 5.59257600  | -2.98226700 | 0.13543600  |
| H | 6.21941800  | -2.11529000 | 0.38038400  |
| C | 4.13155500  | -2.74084000 | 0.52109800  |
| H | 4.04203500  | -2.59070800 | 1.60275500  |
| H | 3.53705500  | -3.63294500 | 0.29068600  |
| C | 3.53489100  | -1.53688300 | -0.20755200 |
| H | 3.67694600  | -1.62414600 | -1.29295900 |
| H | 4.04187000  | -0.60781200 | 0.09046500  |

|    |             |             |             |
|----|-------------|-------------|-------------|
| C  | 2.04968400  | -1.30420300 | 0.02795700  |
| O  | 1.47259300  | -0.47682400 | -0.74410300 |
| O  | 1.46202300  | -1.94483500 | 0.93776500  |
| C  | 10.22720300 | -0.83963600 | 2.93750800  |
| H  | 10.27666600 | -1.08998700 | 1.87143900  |
| C  | 10.54065900 | 0.64759000  | 3.16704300  |
| H  | 11.54603300 | 0.89725300  | 2.81514500  |
| H  | 10.48671200 | 0.86934600  | 4.24070400  |
| C  | 9.55165000  | 1.54793100  | 2.43454600  |
| O  | 8.31538300  | 1.39154300  | 2.88018400  |
| O  | 9.88445300  | 2.29649900  | 1.52436300  |
| C  | 4.94744400  | 0.49540700  | -4.59086300 |
| H  | 4.49105300  | -0.40386900 | -4.16205600 |
| C  | 5.11363500  | 1.58552200  | -3.53201800 |
| H  | 4.12849700  | 1.82983300  | -3.11627100 |
| H  | 5.49695100  | 2.50616700  | -3.99808200 |
| C  | 6.04314900  | 1.17056700  | -2.38519200 |
| H  | 7.06443000  | 1.01549300  | -2.76726600 |
| H  | 5.70950500  | 0.19610300  | -1.99993000 |
| C  | 6.04668700  | 2.17769000  | -1.23074700 |
| H  | 5.01379300  | 2.34719900  | -0.91078300 |
| H  | 6.44057900  | 3.14679200  | -1.57624900 |
| C  | 6.84674600  | 1.70297000  | -0.01477600 |
| H  | 7.92117600  | 1.66909300  | -0.22967200 |
| H  | 6.53691100  | 0.68396100  | 0.24898900  |
| N  | 6.66001600  | 2.52592400  | 1.19836600  |
| H  | 5.65621900  | 2.55342600  | 1.41968800  |
| H  | 6.95371700  | 3.48382700  | 1.00697300  |
| H  | 7.63237900  | 1.91798100  | 2.26626900  |
| C  | -0.85559500 | -0.02960900 | -6.84994900 |
| H  | -0.08919500 | -0.75518700 | -6.55684500 |
| C  | -1.71843100 | 0.34665400  | -5.64938700 |
| H  | -2.20734700 | -0.54476900 | -5.23702100 |
| H  | -2.51105600 | 1.04519900  | -5.95863500 |
| O  | -0.92131200 | 0.95701200  | -4.62777800 |
| H  | -1.22197800 | 0.64074600  | -3.73485200 |
| O  | -3.17922300 | -1.13407300 | -2.07989400 |
| H  | -3.37301000 | -2.07274400 | -1.72063100 |
| Mg | -0.28678400 | -1.43690600 | 1.85241700  |
| Mg | 0.76563300  | 1.22892200  | -1.53108000 |
| C  | 1.57812300  | 5.39619900  | 0.13979300  |
| H  | 1.93350800  | 6.43102300  | 0.16054000  |
| H  | 1.31648000  | 5.12210200  | -0.88921400 |
| O  | 2.63242500  | 4.58496900  | 0.64026700  |

|   |             |             |             |
|---|-------------|-------------|-------------|
| P | 2.48851700  | 2.95878700  | 0.58864900  |
| O | 3.69569500  | 2.36446300  | 1.22404100  |
| O | 2.08597400  | 2.56563900  | -0.83447700 |
| O | 1.14919400  | 2.79805200  | 1.56020700  |
| P | -0.09734600 | 1.74972900  | 1.54900700  |
| O | 0.28614400  | 0.45933100  | 2.22300600  |
| O | -1.21608900 | 2.51965200  | 2.36852400  |
| O | -0.55467600 | 1.64599600  | 0.06398300  |
| P | -1.98421800 | 0.20091500  | -0.84824200 |
| O | -3.21163500 | 1.07781200  | -0.65487900 |
| O | -1.07025000 | 0.38485200  | -2.05767500 |
| O | -1.67562200 | -0.87233100 | 0.18879600  |
| O | 1.55194100  | 0.53658000  | -3.39857700 |
| H | 1.76101300  | -0.43256700 | -3.35954100 |
| H | 0.84086200  | 0.57669500  | -4.07280700 |
| O | 0.13189000  | 2.91756100  | -2.83333500 |
| H | 1.00853200  | 3.26471500  | -3.06344100 |
| H | -0.25029800 | 2.54148800  | -3.65308800 |
| O | -1.20845300 | -3.27022100 | 1.40971700  |
| H | -1.47486300 | -3.38534400 | 0.47172600  |
| H | -0.76059900 | -4.11288900 | 1.62246300  |
| H | -2.69045400 | -3.61582700 | 7.77921700  |
| H | -4.21075700 | -2.72118800 | 7.62787300  |
| H | 9.22109200  | -1.07717400 | 3.29383000  |
| H | 10.94443600 | -1.47868500 | 3.46651100  |
| H | -3.60569300 | -7.44040500 | -3.50891200 |
| H | -2.49792700 | -7.46819600 | -2.12534100 |
| H | -4.48239300 | 7.26810200  | -2.72143600 |
| H | -6.15496000 | 7.54100300  | -2.21289700 |
| H | -1.47384200 | -0.46995400 | -7.64135700 |
| H | -0.35337500 | 0.85501900  | -7.25770200 |
| H | -9.62095400 | 4.17464400  | 1.04797100  |
| H | -7.89767700 | 4.57070100  | 0.95679900  |
| H | 5.91432800  | 0.20700700  | -5.02595800 |
| H | 1.00757800  | -6.35862300 | -4.07772500 |
| H | 0.76937700  | -5.63433400 | -2.47891800 |
| H | 2.52075100  | -6.62230300 | 0.07548200  |
| H | 1.57973700  | -5.18433800 | -0.38048700 |
| H | 0.68640300  | 5.31013600  | 0.77382300  |
| H | 6.00894800  | -3.84959000 | 0.66291000  |
| H | 5.69503900  | -3.16693300 | -0.94192300 |
| H | 4.29797400  | 0.82741900  | -5.40969100 |
| H | -4.03903600 | -0.68669500 | -2.09002400 |

## ATPase-P

|   |            |             |             |
|---|------------|-------------|-------------|
| C | 8.78548300 | -2.94510900 | 2.49706700  |
| H | 8.34342300 | -3.11522100 | 3.48637900  |
| C | 8.37372400 | -1.58180500 | 1.93319700  |
| H | 8.86130800 | -1.42671100 | 0.95991100  |
| H | 8.75144600 | -0.78564100 | 2.59126200  |
| C | 6.85644600 | -1.42373900 | 1.76626400  |
| H | 6.36228900 | -1.59504700 | 2.73352400  |
| H | 6.46819000 | -2.19528600 | 1.09053800  |
| C | 6.48529200 | -0.03584000 | 1.21989300  |
| H | 6.97502100 | 0.10799600  | 0.24946700  |
| H | 6.87766100 | 0.73831400  | 1.89176600  |
| N | 5.06325700 | 0.20857900  | 1.01399800  |
| H | 4.64106300 | 0.08154100  | 0.07392400  |
| C | 4.26415000 | 0.78256200  | 1.92929300  |
| N | 4.61302400 | 0.80192300  | 3.25265800  |
| H | 3.84000300 | 1.09769900  | 3.85685700  |
| H | 5.08763200 | -0.02762000 | 3.58375300  |
| N | 3.16414800 | 1.40714200  | 1.56111100  |
| H | 2.86325600 | 1.46315600  | 0.57301200  |
| H | 2.45148000 | 1.58954000  | 2.27352600  |
| C | 5.79322400 | -7.59684700 | -0.85939600 |
| H | 6.23309800 | -8.55675000 | -0.56228600 |
| C | 6.62706400 | -6.42148400 | -0.34529600 |
| H | 7.67104700 | -6.55151300 | -0.66352800 |
| H | 6.63698100 | -6.43325100 | 0.75412200  |
| C | 6.11783700 | -5.06029500 | -0.83610100 |
| H | 6.16410800 | -5.03580100 | -1.93562600 |
| H | 6.80369700 | -4.27327900 | -0.48831500 |
| C | 4.69377900 | -4.71961200 | -0.38062900 |
| H | 4.63303800 | -4.74367100 | 0.71658400  |
| H | 3.98774000 | -5.47819500 | -0.74415600 |
| C | 4.24189700 | -3.34839800 | -0.87249600 |
| H | 4.31242200 | -3.30708100 | -1.97196900 |
| H | 4.92650100 | -2.57839600 | -0.50128600 |
| N | 2.89942500 | -2.99622400 | -0.39772600 |
| H | 2.26946400 | -3.04613000 | 1.18001600  |
| H | 2.18181400 | -3.45790100 | -0.96033200 |
| H | 2.76387000 | -2.00083900 | -0.59384200 |
| C | 2.55088700 | 3.74499600  | 7.60994800  |
| H | 2.09602600 | 3.21722100  | 8.45828200  |
| C | 2.44086200 | 2.93030800  | 6.32442100  |
| H | 2.98920600 | 1.98649500  | 6.43167400  |
| H | 2.92500500 | 3.46753500  | 5.49955400  |

|   |             |            |             |
|---|-------------|------------|-------------|
| C | 0.99382100  | 2.62649900 | 5.93991500  |
| H | 0.40212400  | 3.54894900 | 5.87148300  |
| H | 0.50175300  | 2.01973600 | 6.71292400  |
| C | 0.85081900  | 1.89030200 | 4.61019600  |
| O | 1.88250500  | 1.46432500 | 4.03376400  |
| O | -0.33835000 | 1.75900800 | 4.16273200  |
| C | 3.11878500  | 6.99876200 | -2.81381300 |
| H | 2.82900400  | 6.14220300 | -3.43013100 |
| C | 4.07431600  | 6.58417800 | -1.69079600 |
| H | 4.44697500  | 7.47006000 | -1.16164200 |
| H | 4.94592200  | 6.07801900 | -2.12112200 |
| C | 3.40278200  | 5.64292300 | -0.66827000 |
| H | 2.67713600  | 6.18432500 | -0.05491800 |
| H | 4.15277500  | 5.19536000 | -0.00756500 |
| C | 2.66257500  | 4.55394200 | -1.40984400 |
| O | 3.47840600  | 3.74675200 | -2.05918700 |
| O | 1.43498100  | 4.51551100 | -1.47266200 |
| C | -1.13875300 | 5.25685400 | -3.78000900 |
| H | -2.10913000 | 5.44219000 | -3.30686000 |
| C | -1.09466600 | 3.85831800 | -4.41898300 |
| H | -0.09807100 | 3.68202000 | -4.84857400 |
| H | -1.81301400 | 3.78246700 | -5.24014200 |
| C | -1.40316700 | 2.69101900 | -3.47931500 |
| O | -2.18374300 | 1.79096200 | -3.83778800 |
| N | -0.80079200 | 2.70019900 | -2.27812700 |
| H | 0.01018400  | 3.28202400 | -2.08761800 |
| H | -0.93108200 | 1.88512100 | -1.67700400 |
| C | -1.94132100 | 6.10194300 | -0.03989000 |
| H | -2.45584900 | 5.18303500 | -0.33821500 |
| C | -0.99506400 | 5.83204900 | 1.12820700  |
| H | -1.55898000 | 5.50321700 | 2.00681300  |
| H | -0.47129000 | 6.76120200 | 1.40811600  |
| O | -0.04930700 | 4.79878000 | 0.87013100  |
| H | 0.38953400  | 4.93249300 | 0.00452600  |
| C | -5.66203800 | 2.86495800 | -0.22649500 |
| H | -6.41388800 | 2.06662100 | -0.19039300 |
| C | -4.35493100 | 2.42340700 | 0.43438900  |
| H | -4.51717900 | 2.19157700 | 1.49219000  |
| H | -3.63401000 | 3.25237200 | 0.40886900  |
| C | -3.74444300 | 1.20174600 | -0.26112500 |
| H | -3.63828500 | 1.37204900 | -1.33763200 |
| H | -4.40869100 | 0.33594900 | -0.13645400 |
| C | -2.39220100 | 0.78458000 | 0.29275800  |
| O | -1.50239400 | 0.41808400 | -0.53473000 |

|    |              |             |             |
|----|--------------|-------------|-------------|
| O  | -2.22684700  | 0.84523600  | 1.54679700  |
| C  | -10.35198500 | 0.71079100  | 2.47276700  |
| H  | -10.46616500 | 0.76784500  | 1.38409700  |
| C  | -10.44787000 | -0.74559700 | 2.95847800  |
| H  | -11.41805700 | -1.17827400 | 2.69688000  |
| H  | -10.33874000 | -0.77301800 | 4.04979300  |
| C  | -9.36556600  | -1.62393400 | 2.33808200  |
| O  | -8.15481800  | -1.30822100 | 2.77363100  |
| O  | -9.61316400  | -2.49437300 | 1.51396600  |
| C  | -4.51125800  | -0.98382500 | -4.55212500 |
| H  | -4.17341300  | -0.02361600 | -4.14959300 |
| C  | -4.69384200  | -2.02072800 | -3.44230000 |
| H  | -3.73127200  | -2.16468700 | -2.93978400 |
| H  | -4.97409600  | -2.99254600 | -3.87667300 |
| C  | -5.73967500  | -1.60673200 | -2.39804600 |
| H  | -6.74853700  | -1.62697100 | -2.83928400 |
| H  | -5.55377700  | -0.55960400 | -2.11808900 |
| C  | -5.68689100  | -2.46770700 | -1.13006300 |
| H  | -4.65526900  | -2.49007300 | -0.76374500 |
| H  | -5.96009800  | -3.50805400 | -1.36533500 |
| C  | -6.58182600  | -1.94290300 | -0.00374200 |
| H  | -7.64472100  | -2.05191400 | -0.24800100 |
| H  | -6.39757500  | -0.86955600 | 0.13598500  |
| N  | -6.36372100  | -2.58253400 | 1.31126600  |
| H  | -5.36244700  | -2.54580300 | 1.54325200  |
| H  | -6.60903300  | -3.57073200 | 1.24952400  |
| H  | -7.42198000  | -1.86797900 | 2.26443800  |
| C  | 1.39395000   | -0.31744600 | -6.48576300 |
| H  | 1.77166700   | 0.49008800  | -5.84787400 |
| C  | 1.47337500   | -1.65268300 | -5.75175300 |
| H  | 2.51952200   | -1.89462000 | -5.51004400 |
| H  | 1.09085700   | -2.46115400 | -6.38555800 |
| O  | 0.68448100   | -1.66725400 | -4.56699100 |
| H  | 1.08590200   | -1.08870300 | -3.85228400 |
| O  | 2.83455300   | 1.39302900  | -3.20263300 |
| H  | 3.00993400   | 2.95818900  | -2.46509400 |
| Mg | -0.46588900  | 0.72911600  | 2.46108100  |
| Mg | -0.45324000  | -1.19430200 | -1.31912800 |
| C  | -1.35201800  | -5.65973100 | 0.12890400  |
| H  | -1.73379400  | -6.68366600 | 0.18234700  |
| H  | -1.11615100  | -5.42382600 | -0.91672300 |
| O  | -2.37412800  | -4.81242600 | 0.63946700  |
| P  | -2.15127500  | -3.19702700 | 0.70563700  |
| O  | -3.30520500  | -2.59594800 | 1.43027500  |



|   |              |             |             |
|---|--------------|-------------|-------------|
| O | -1.78484600  | -2.68890700 | -0.69395900 |
| O | -0.75330600  | -3.18534100 | 1.60466000  |
| P | 0.42962700   | -2.06196000 | 1.70293300  |
| O | 0.09361100   | -1.10959600 | 2.84736700  |
| O | 1.72099100   | -2.92639100 | 2.04226400  |
| O | 0.61842400   | -1.36952900 | 0.36059100  |
| P | 2.35019700   | 0.50783700  | -1.81737200 |
| O | 3.61951600   | -0.23274300 | -1.39356200 |
| O | 1.19002700   | -0.37301400 | -2.33429400 |
| O | 1.89240300   | 1.61999800  | -0.86562600 |
| O | -1.52765600  | -0.83586000 | -3.12905100 |
| H | -1.85596200  | 0.09210400  | -3.22608800 |
| H | -0.96364300  | -0.99228100 | -3.91239400 |
| O | 0.24973800   | -3.12405200 | -2.27513100 |
| H | -0.64936500  | -3.44821400 | -2.06723700 |
| H | 0.31321500   | -2.93242900 | -3.23450400 |
| O | 0.43792000   | 2.08802300  | 1.25777200  |
| H | 0.80758300   | 1.83542500  | 0.36446600  |
| H | 0.13536400   | 3.02216800  | 1.20223900  |
| H | 2.03843300   | 4.71118700  | 7.51547200  |
| H | 3.59683600   | 3.94968000  | 7.87046300  |
| H | -9.37953700  | 1.13811600  | 2.73454900  |
| H | -11.13627000 | 1.32766200  | 2.92724700  |
| H | 3.59081100   | 7.73506300  | -3.47497800 |
| H | 2.20157800   | 7.44809300  | -2.41477600 |
| H | 4.77037300   | -7.57208000 | -0.47029800 |
| H | 5.73152800   | -7.58612000 | -1.95540400 |
| H | 1.99192900   | -0.34298800 | -7.40584300 |
| H | 0.35661900   | -0.08661700 | -6.75113500 |
| H | 9.87413200   | -3.02156000 | 2.60018200  |
| H | 8.45325900   | -3.76074600 | 1.84358500  |
| H | -5.45032900  | -0.80759100 | -5.09616300 |
| H | -0.98488800  | 6.02680700  | -4.54559700 |
| H | -0.36070700  | 5.37926800  | -3.02182500 |
| H | -2.69249900  | 6.85041400  | 0.24045300  |
| H | -1.39453900  | 6.48200800  | -0.91076800 |
| H | -0.43899700  | -5.57909000 | 0.72931300  |
| H | -6.08858100  | 3.74321300  | 0.27406500  |
| H | -5.50683800  | 3.12279900  | -1.28171100 |
| H | -3.76179900  | -1.31125700 | -5.28284100 |
| H | 3.72907100   | 1.07664500  | -3.40942100 |
